# Supplementary material for: Pseudo-multicomponent 1,3-dipolar cycloaddition involving metal-free generation of unactivated azomethine ylides
Source: Royal Society of Chemistry journal article supplement (doi:10.1039/d3ob00023k), 2023-01-01
Supplement: d3ob00023k1.pdf [file d3ob00023k1.pdf]

## SUPPORTING INFORMATION

### ***pseudo*-Multicomponent 1,3-dipolar cycloaddition involving a metal-free generation of unactivated azomethine ylides**

Asmaa Belabbes, María Gracia Retamosa, Francisco Foubelo, Ana Sirvent, Carmen Nájera, Miguel Yus, and José M. Sansano.

#### TABLE OF CONTENTS

|                           |     |
|---------------------------|-----|
| 1. NMR SPECTRA .....      | S1  |
| 2. DFT CALCULATIONS ..... | S33 |

#### 1. NMR SPECTRA

### $^1\text{H}$ NMR of **2aa**

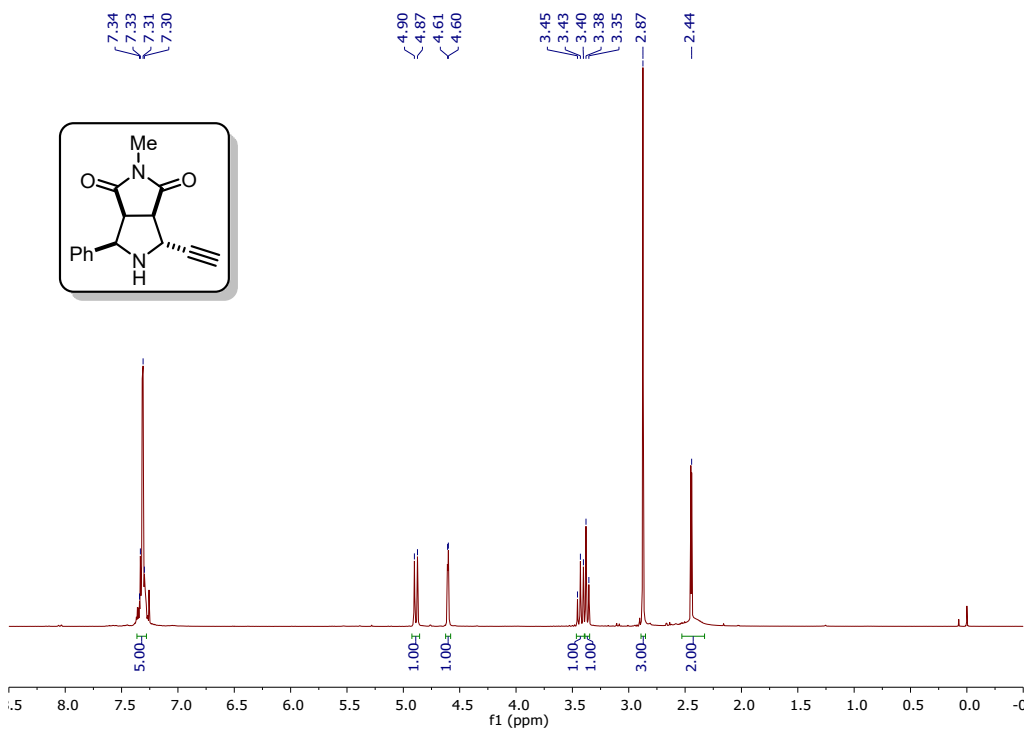

### $^{13}\text{C}\{\text{H}\}$ NMR of **2aa**

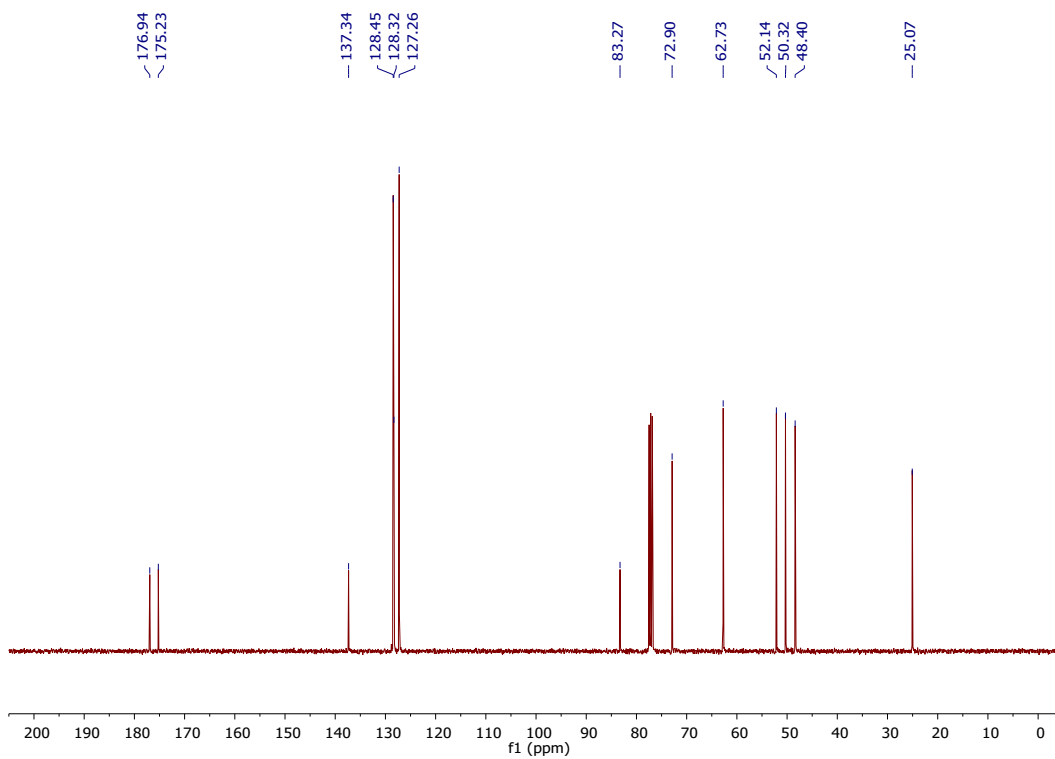

### $^1\text{H}$ NMR of **2ab**

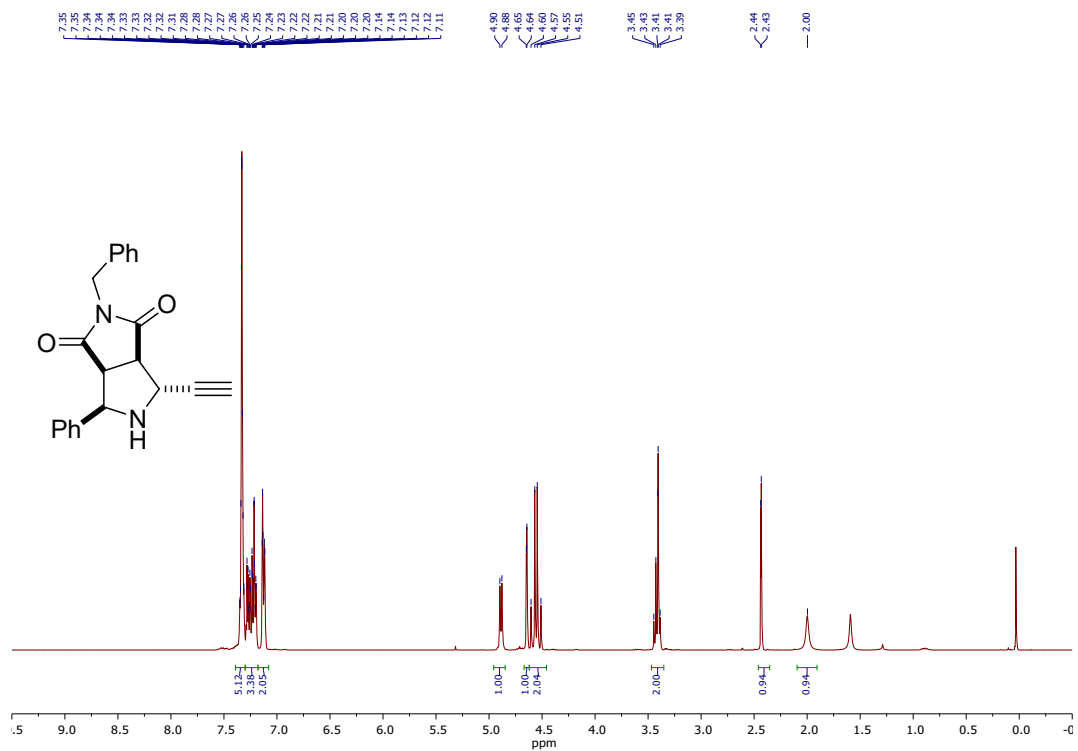

<sup>13</sup>C{<sup>1</sup>H} NMR of **2ab**

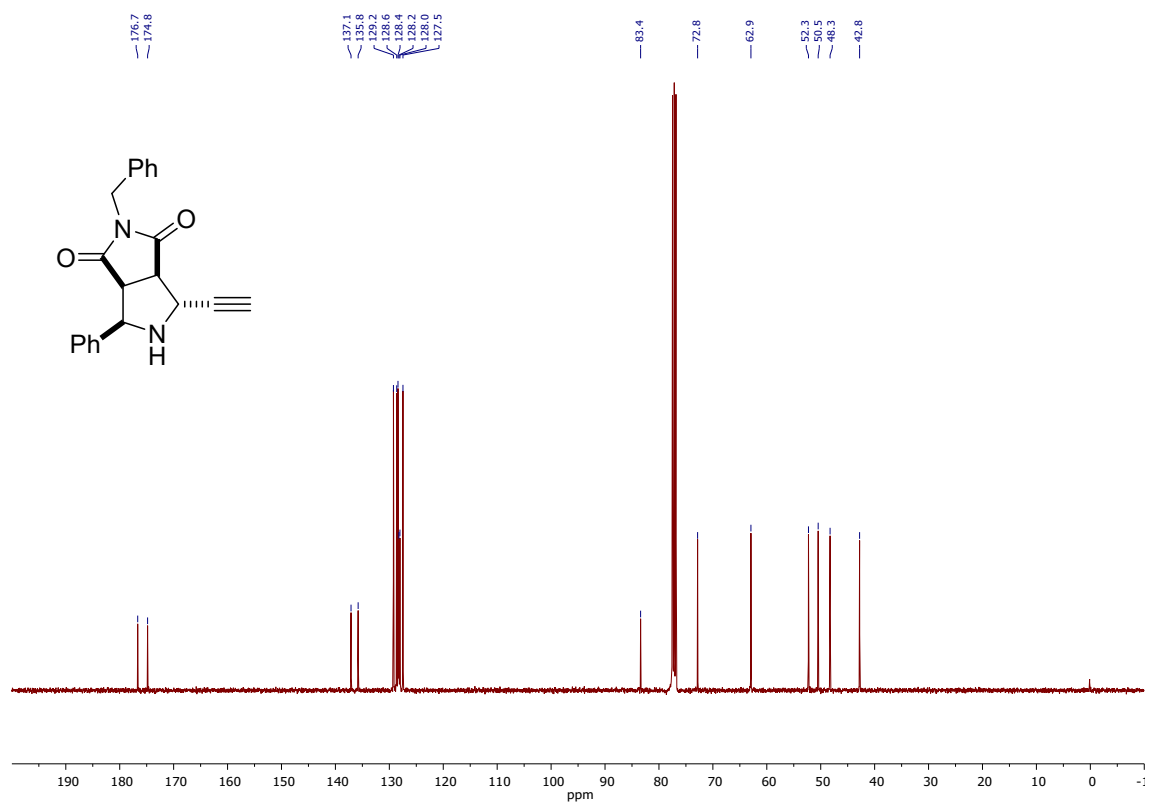

### <sup>1</sup>H NMR of 2ac

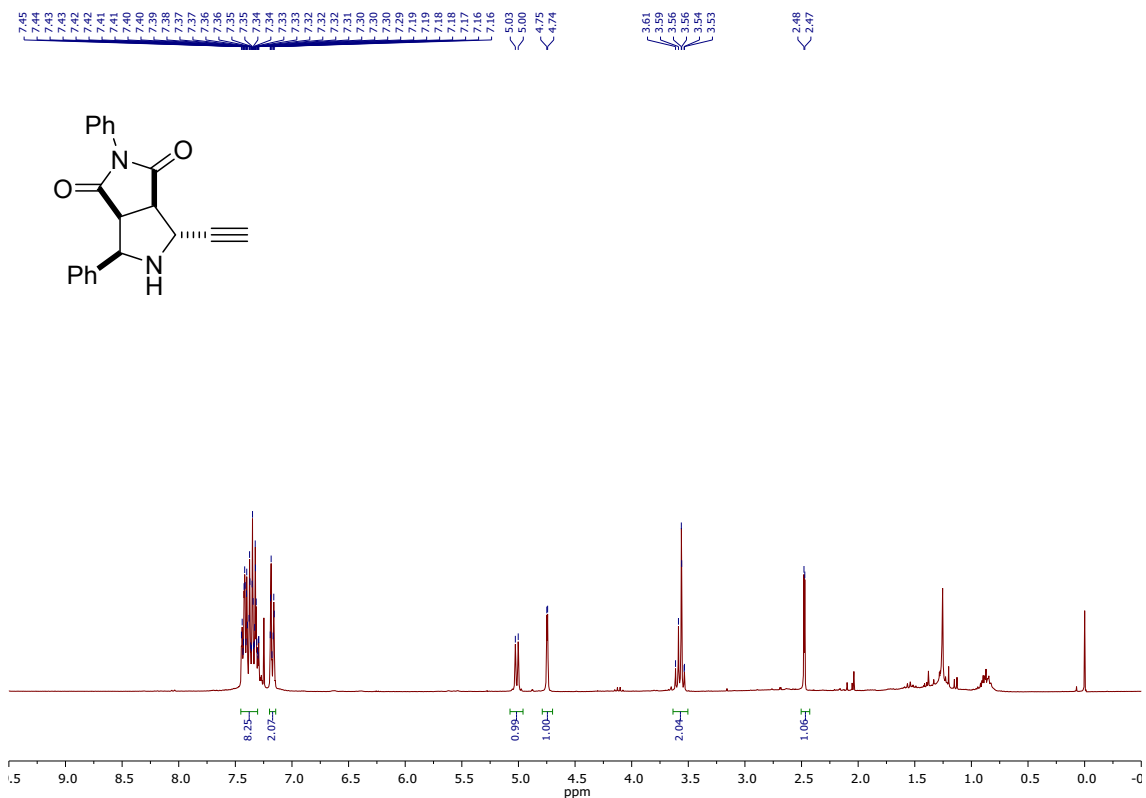

### <sup>13</sup>C{<sup>1</sup>H} NMR of 2ac

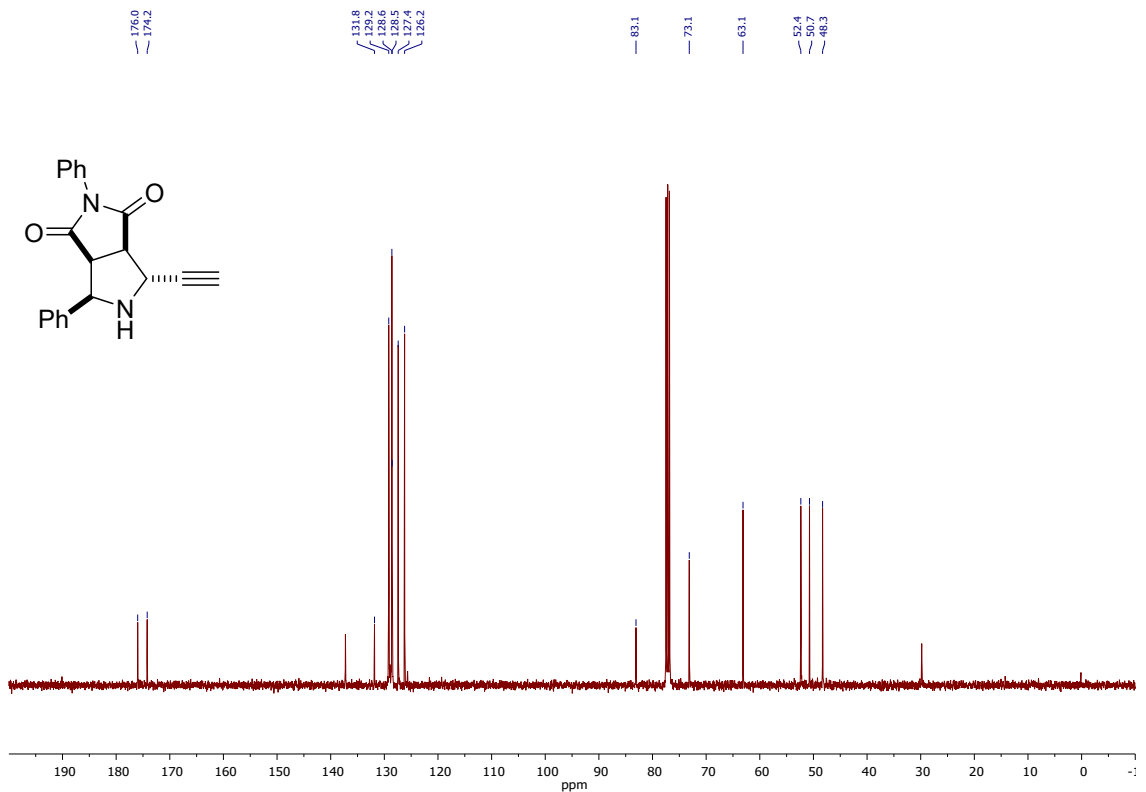

### $^1\text{H}$ NMR of **2ad**

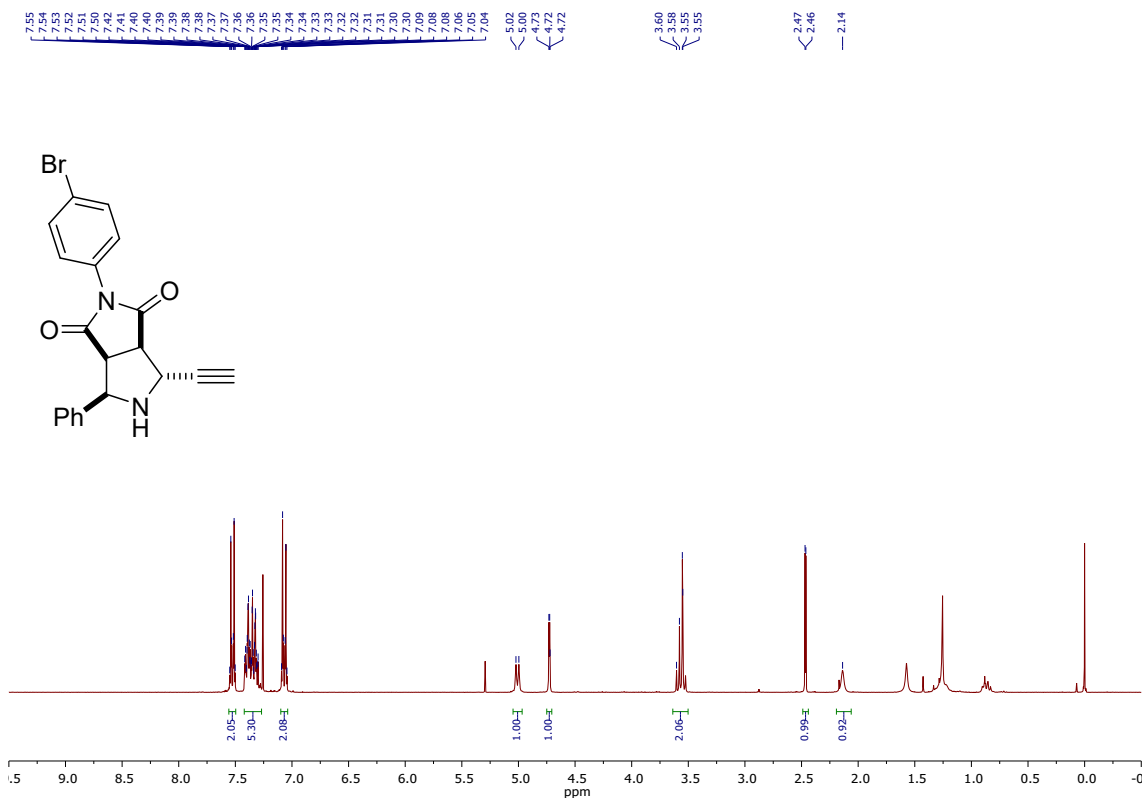

### $^{13}\text{C}\{\text{H}\}$ NMR of **2ad**

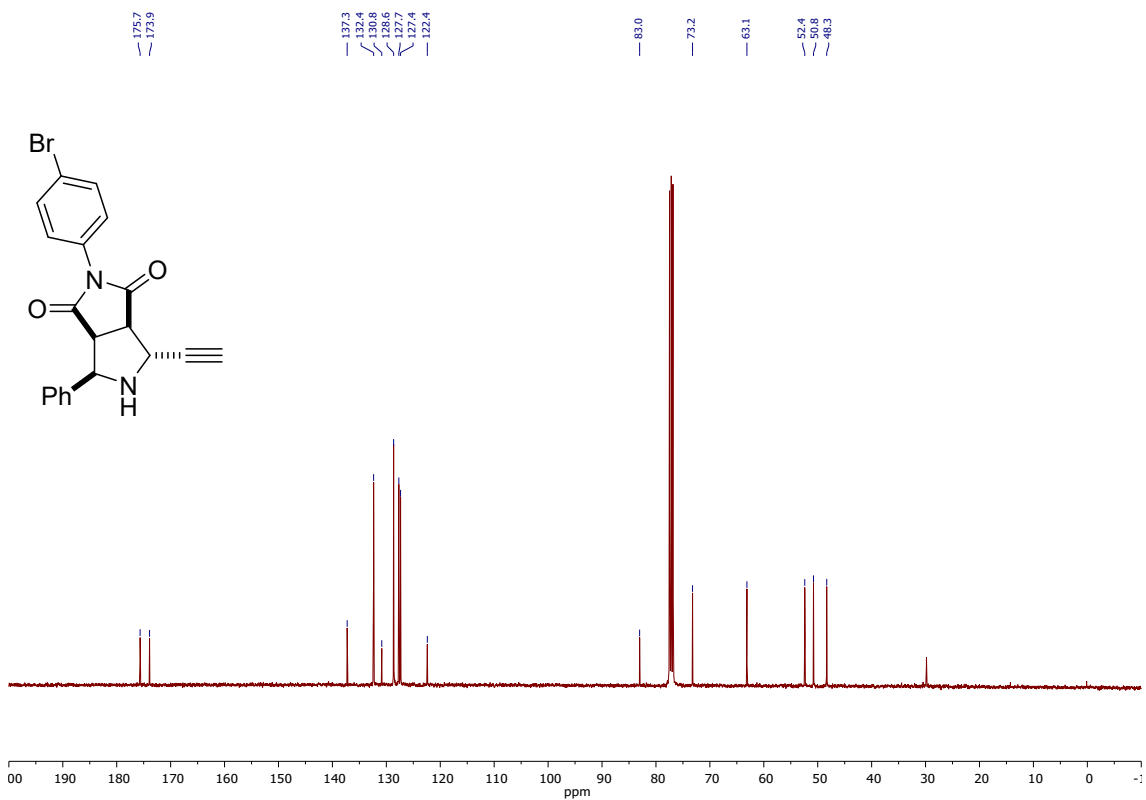

### <sup>1</sup>H NMR of 2ba

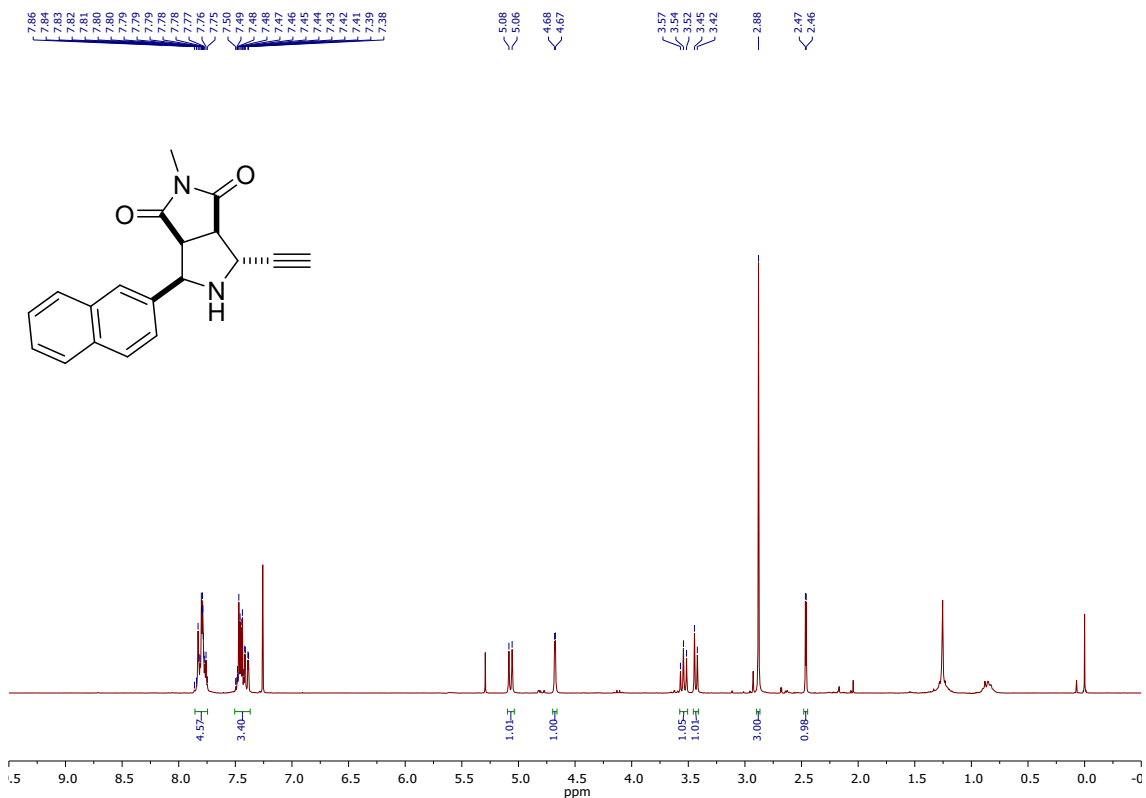

### <sup>13</sup>C{H} NMR of 2ba

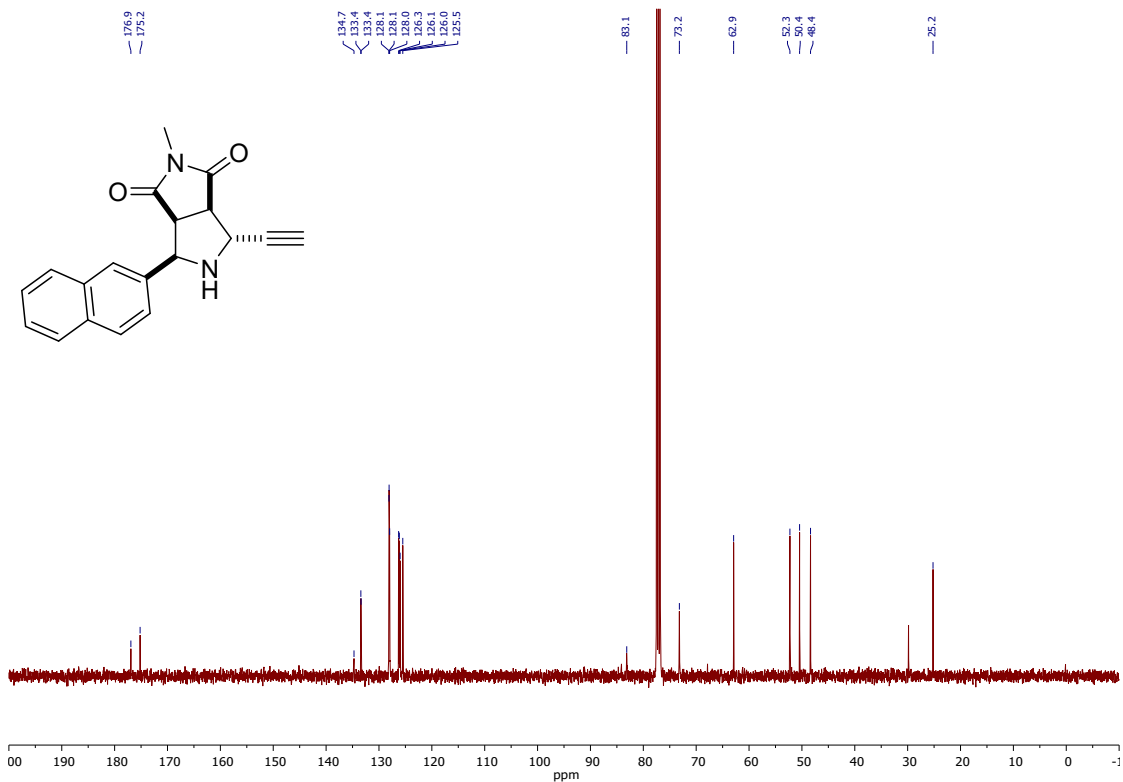

### <sup>1</sup>H NMR of 2ca

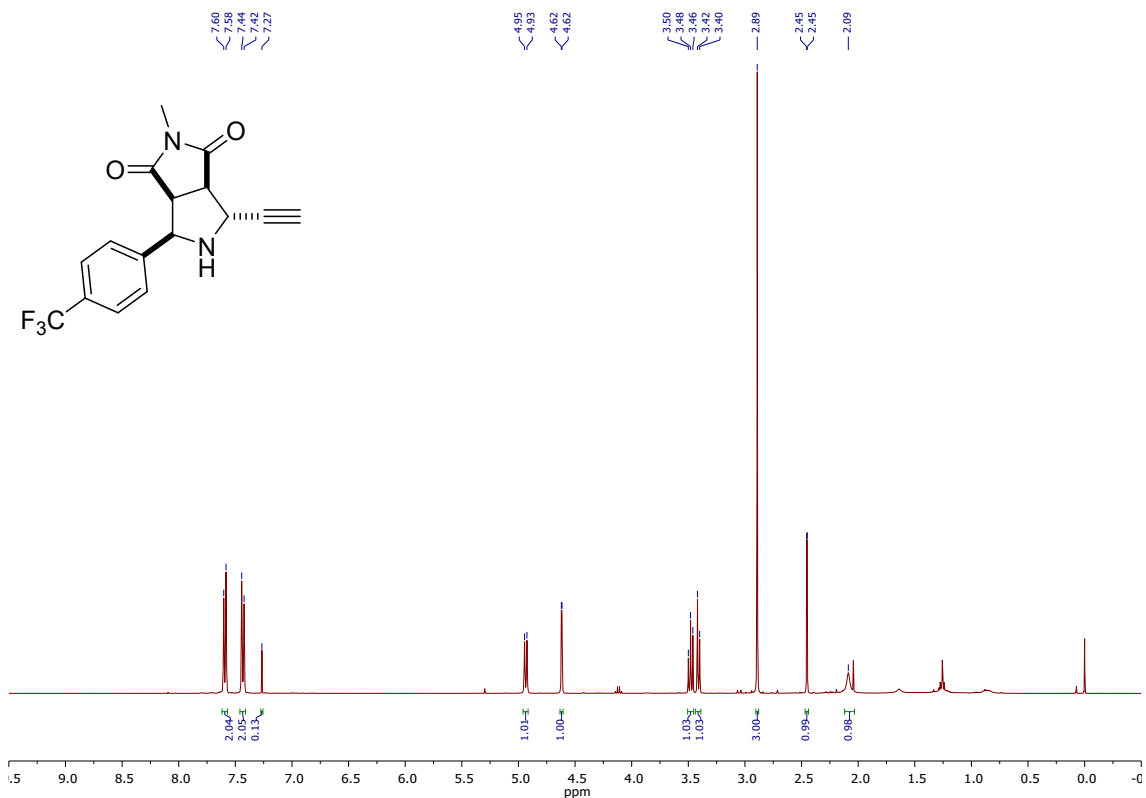

### <sup>13</sup>C{<sup>1</sup>H} NMR of 2ca

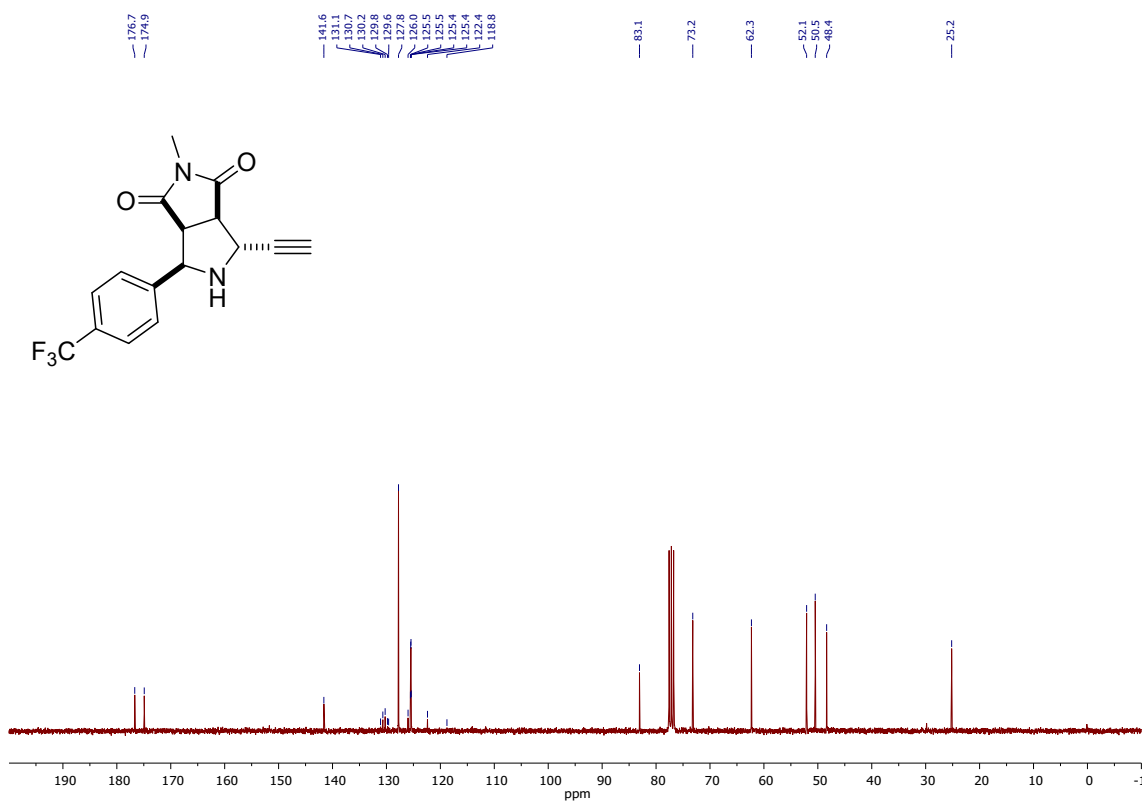

### $^{19}\text{F}$ NMR of **2ca**

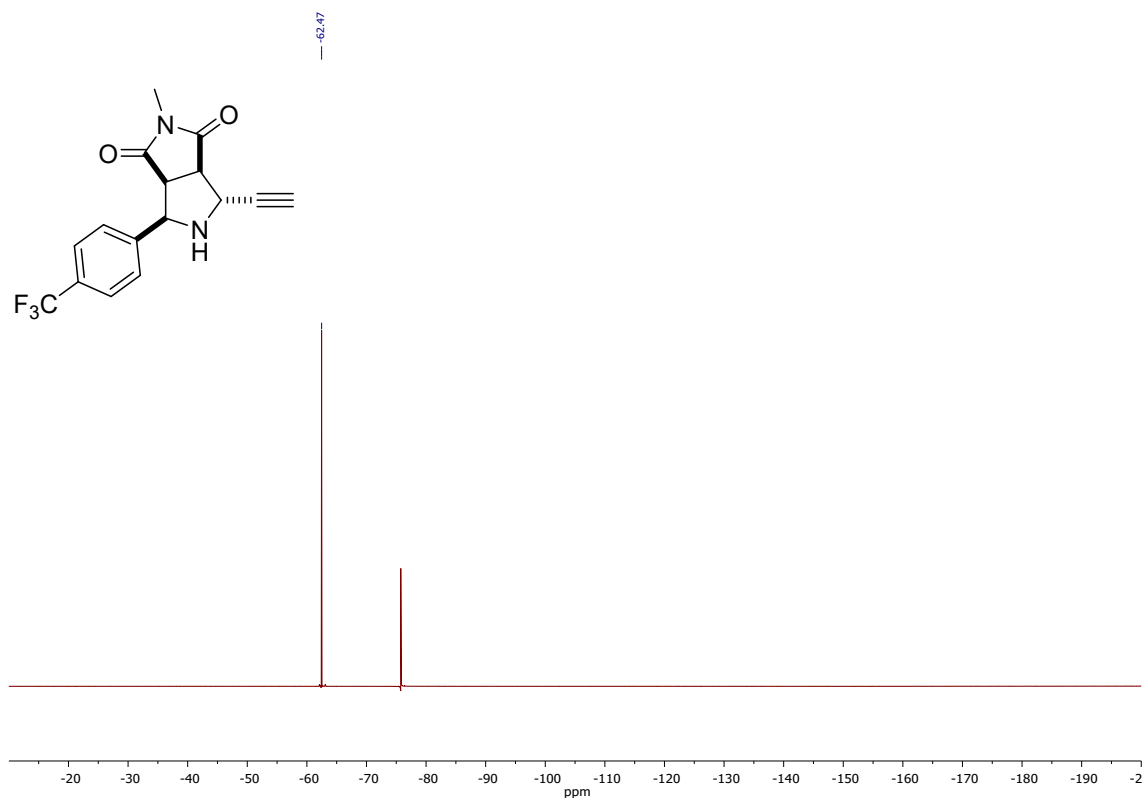

### $^1\text{H}$ NMR of **2da**

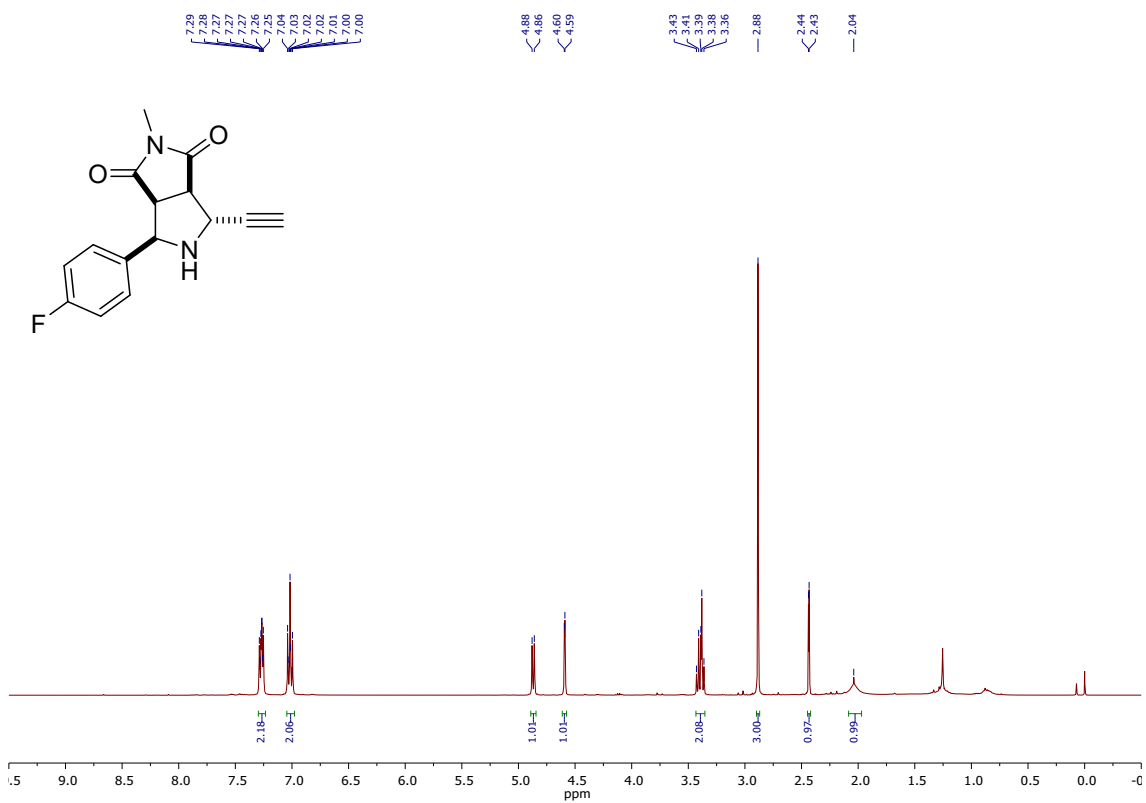



### $^{13}\text{C}\{\text{H}\}$ NMR of **2da**

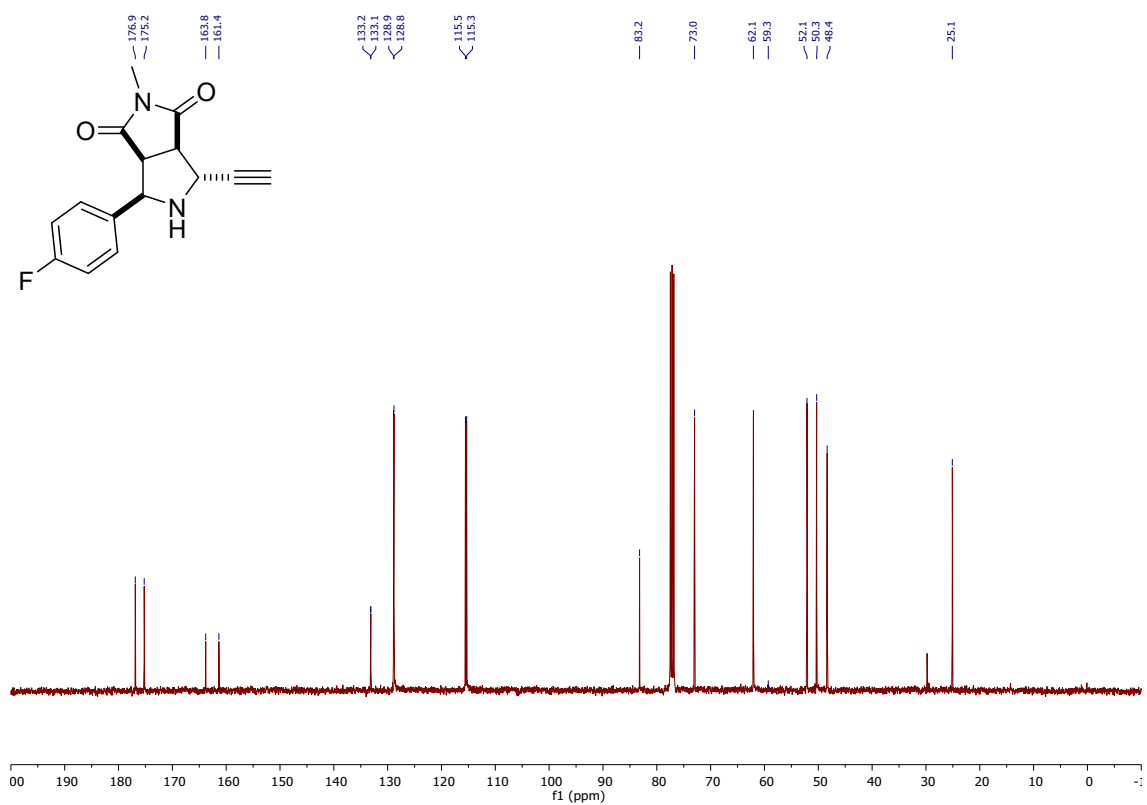

### $^{19}\text{F}$ NMR of **2da**

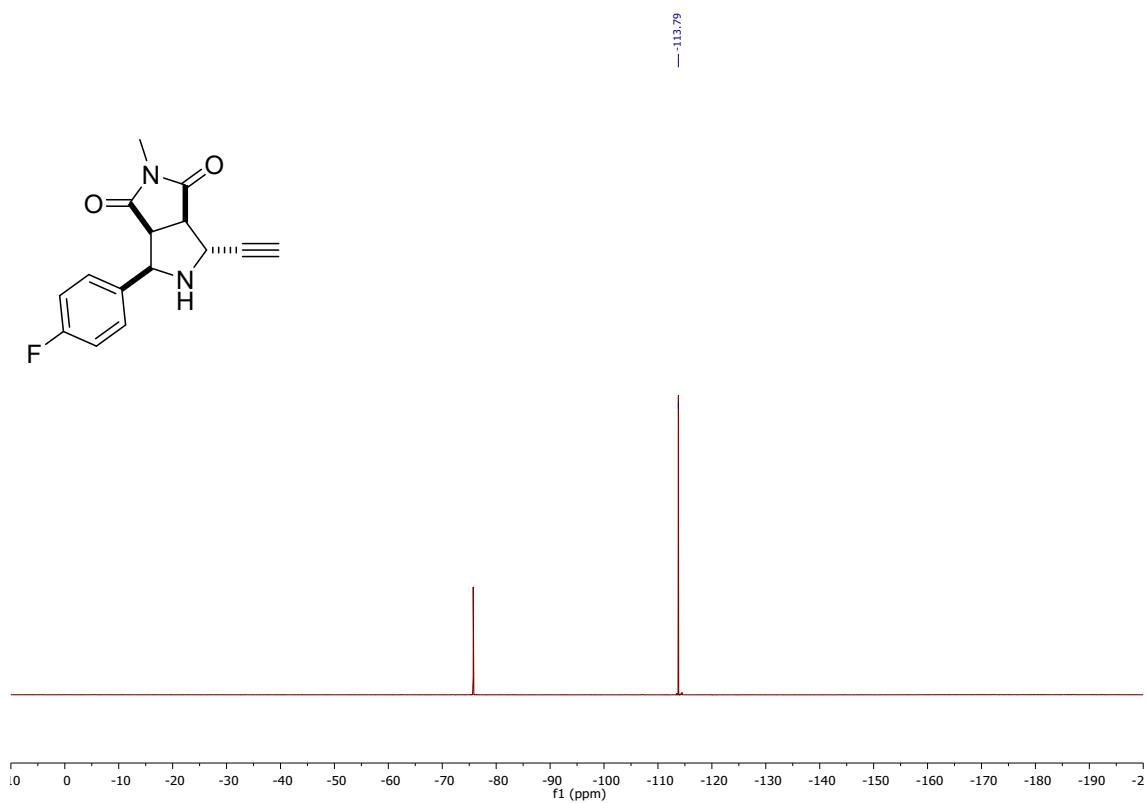

### $^1\text{H}$ NMR of **2ea**

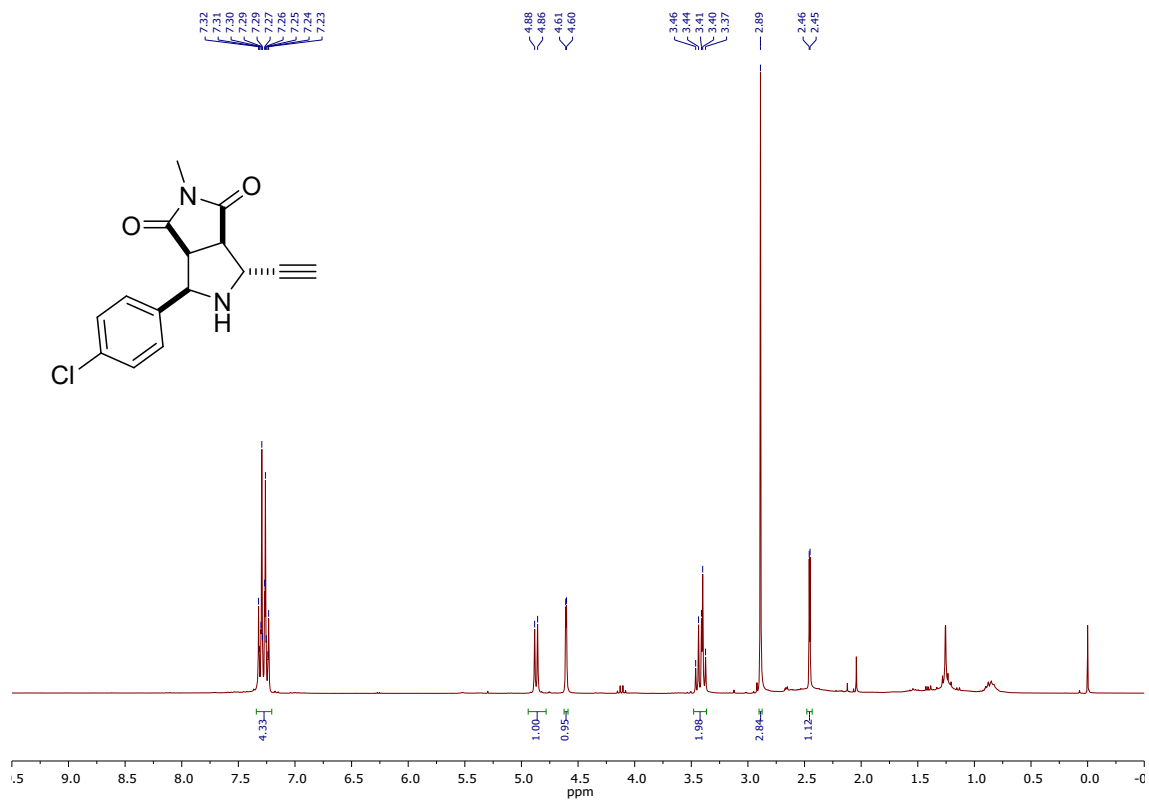

**<sup>13</sup>C{<sup>1</sup>H} NMR of 2ea**

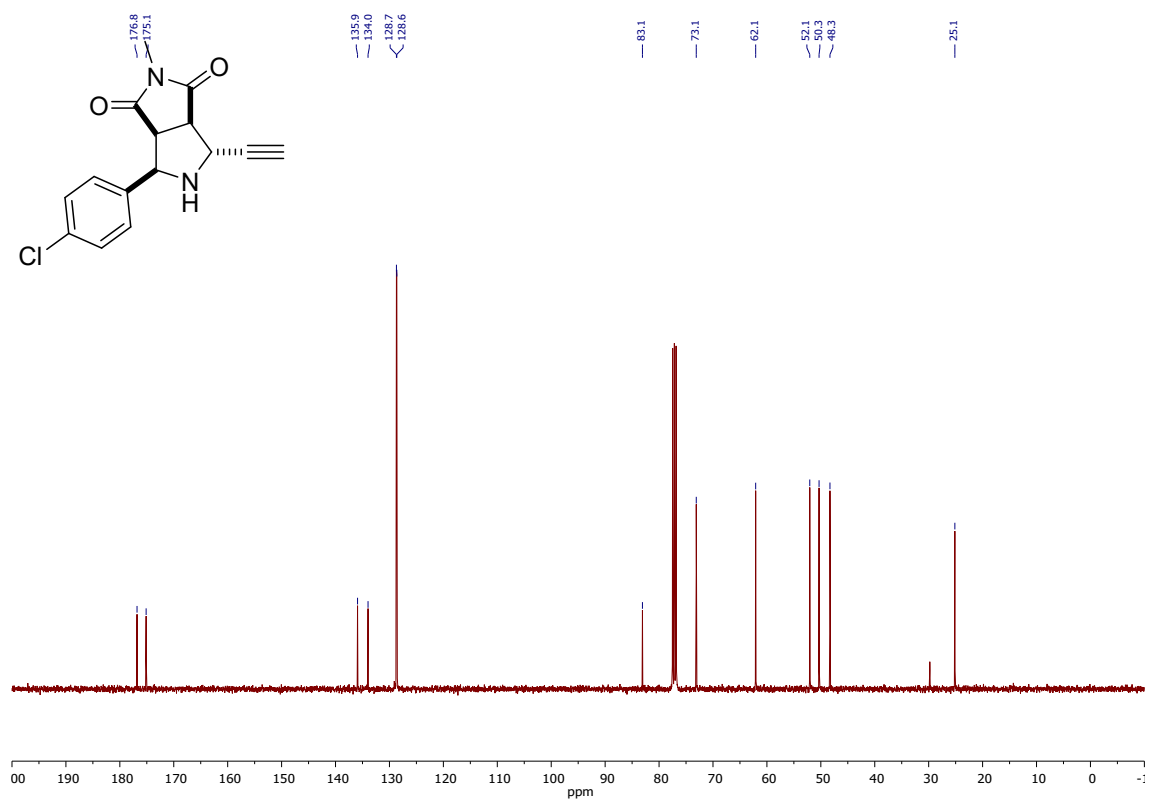

### $^1\text{H}$ NMR of **2fa**

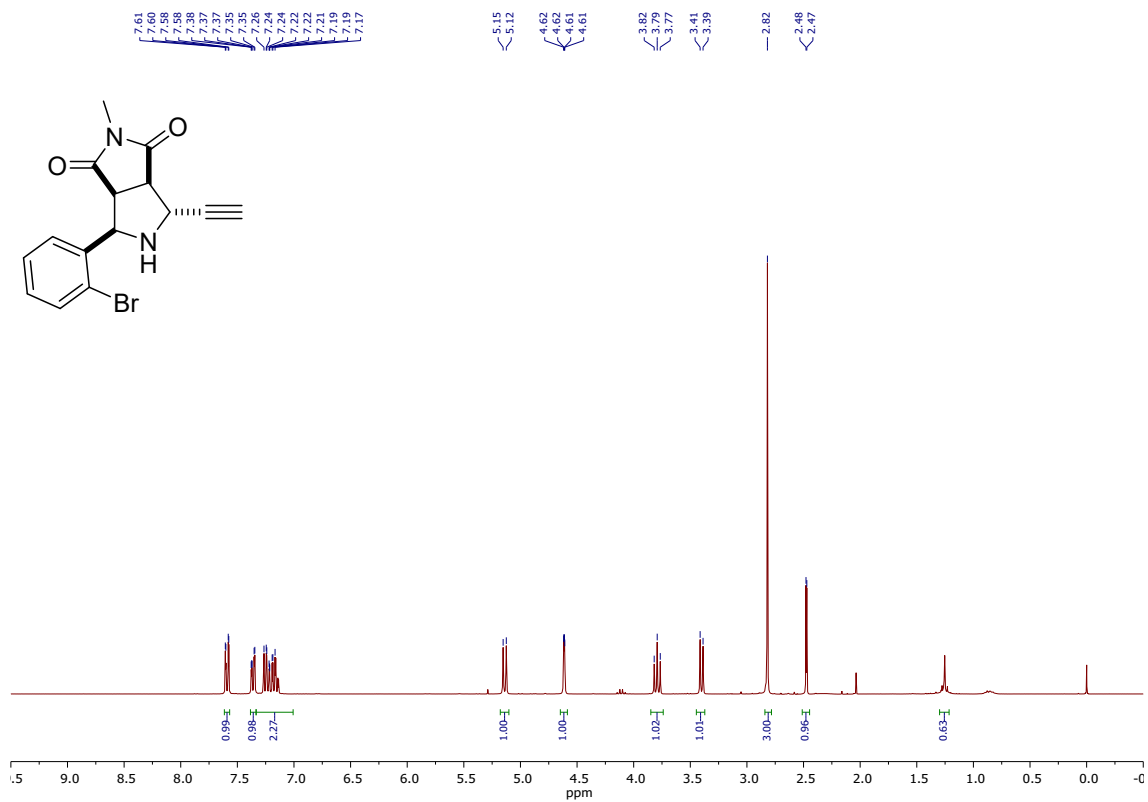

### $^{13}\text{C}\{^1\text{H}\}$ NMR of **2fa**

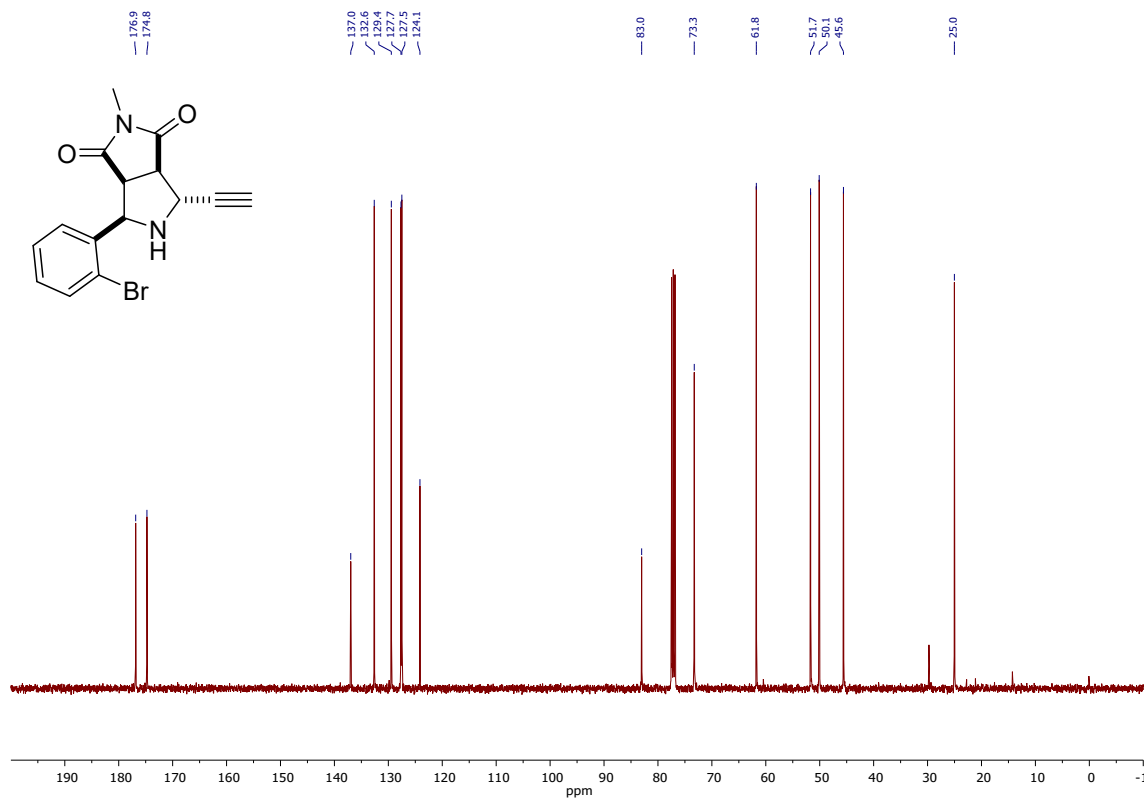

### <sup>1</sup>H NMR of 2ga

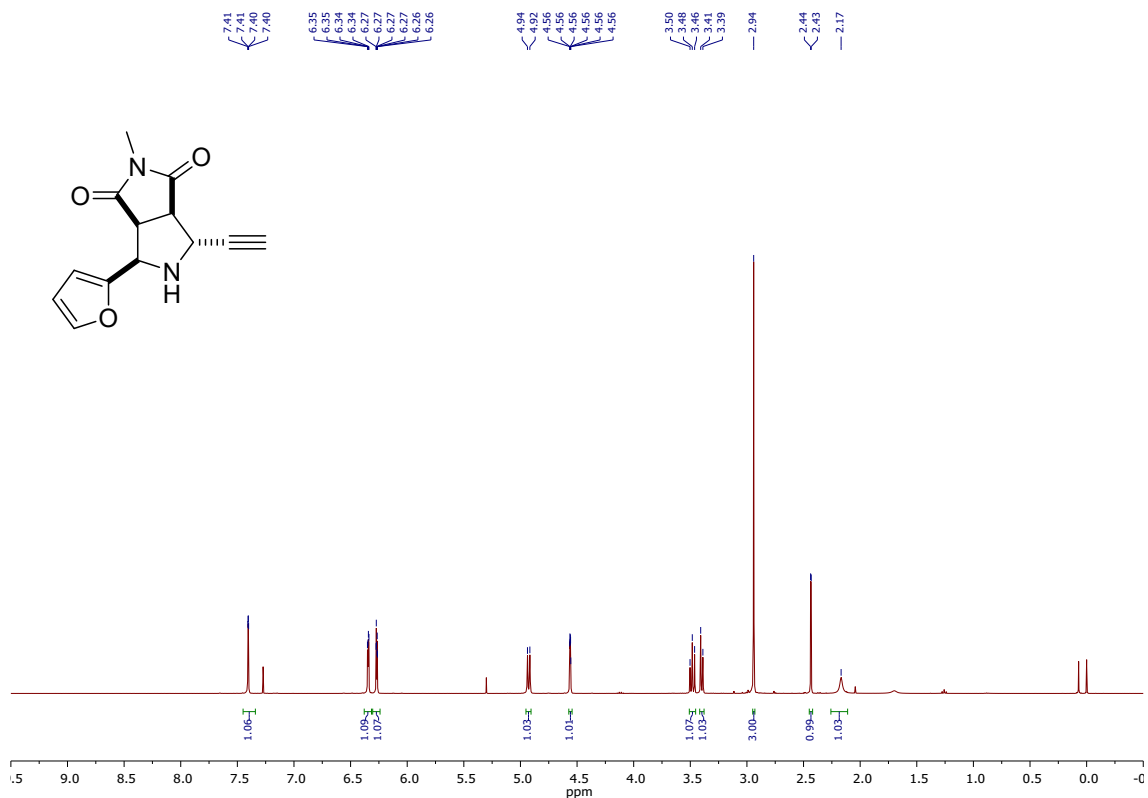

### <sup>13</sup>C{<sup>1</sup>H} NMR of 2ga

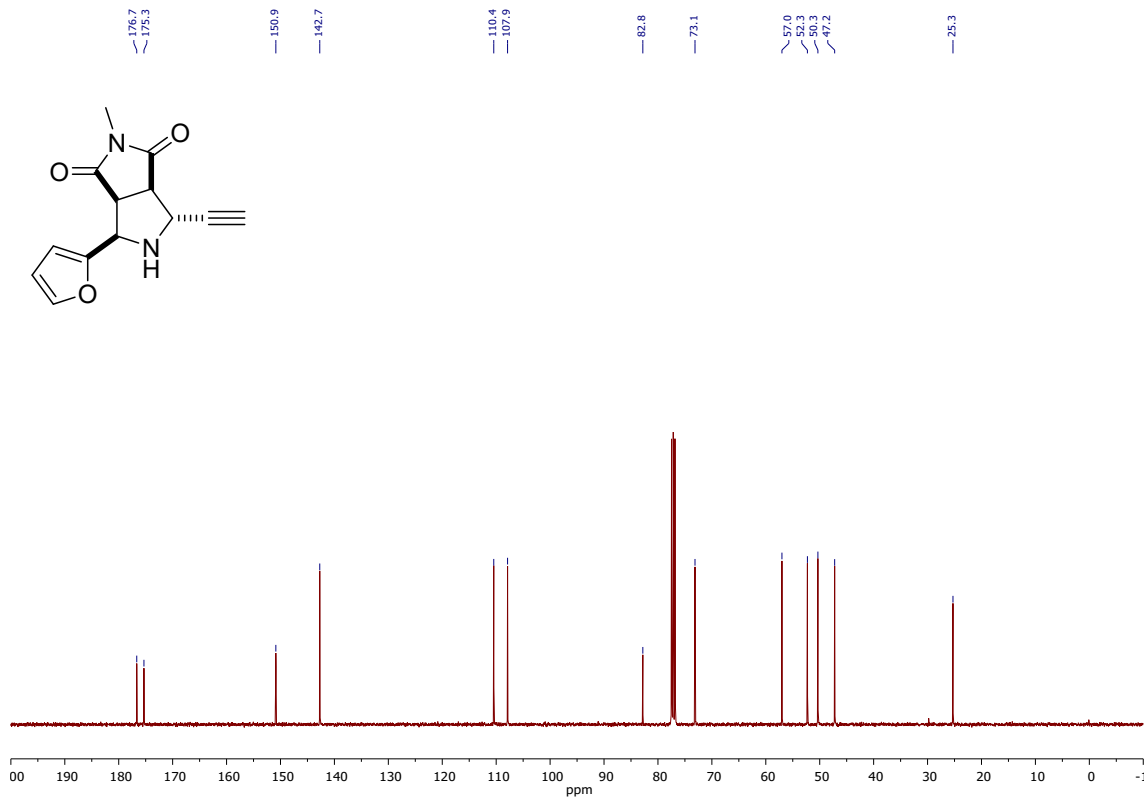

### <sup>1</sup>H NMR of 2ha

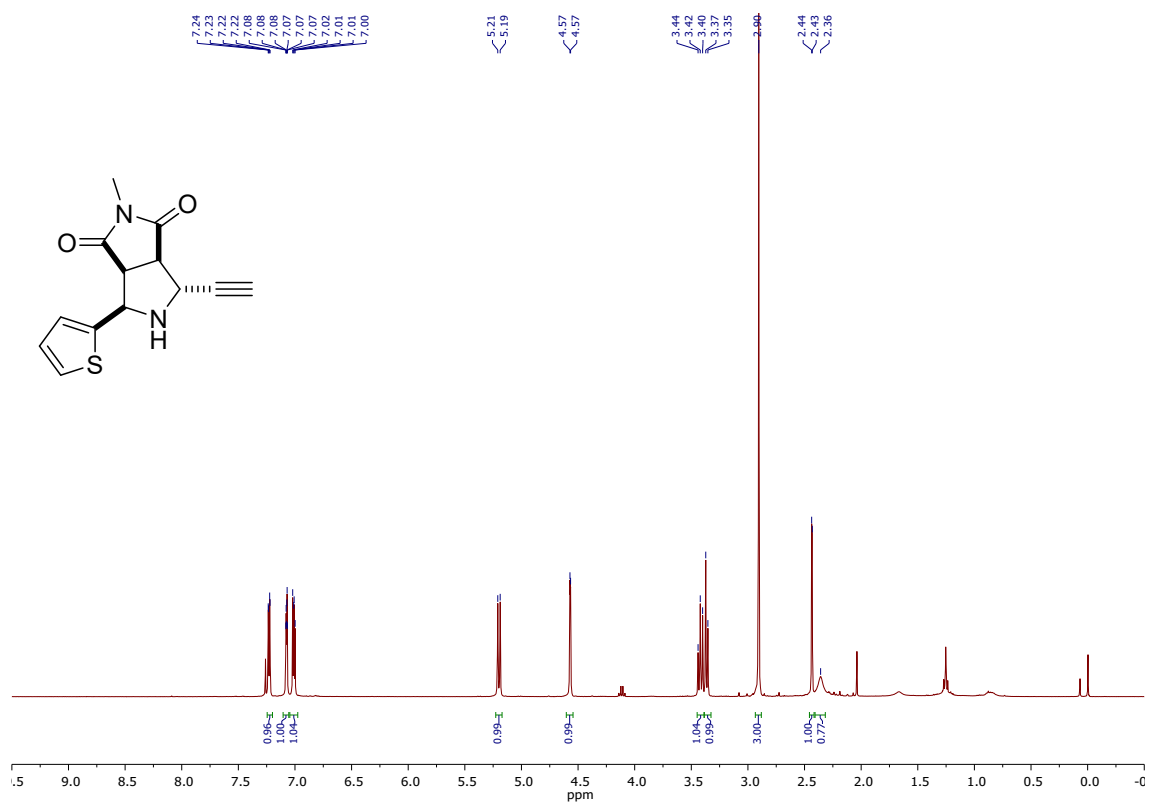

**<sup>13</sup>C{H} NMR of 2ha**

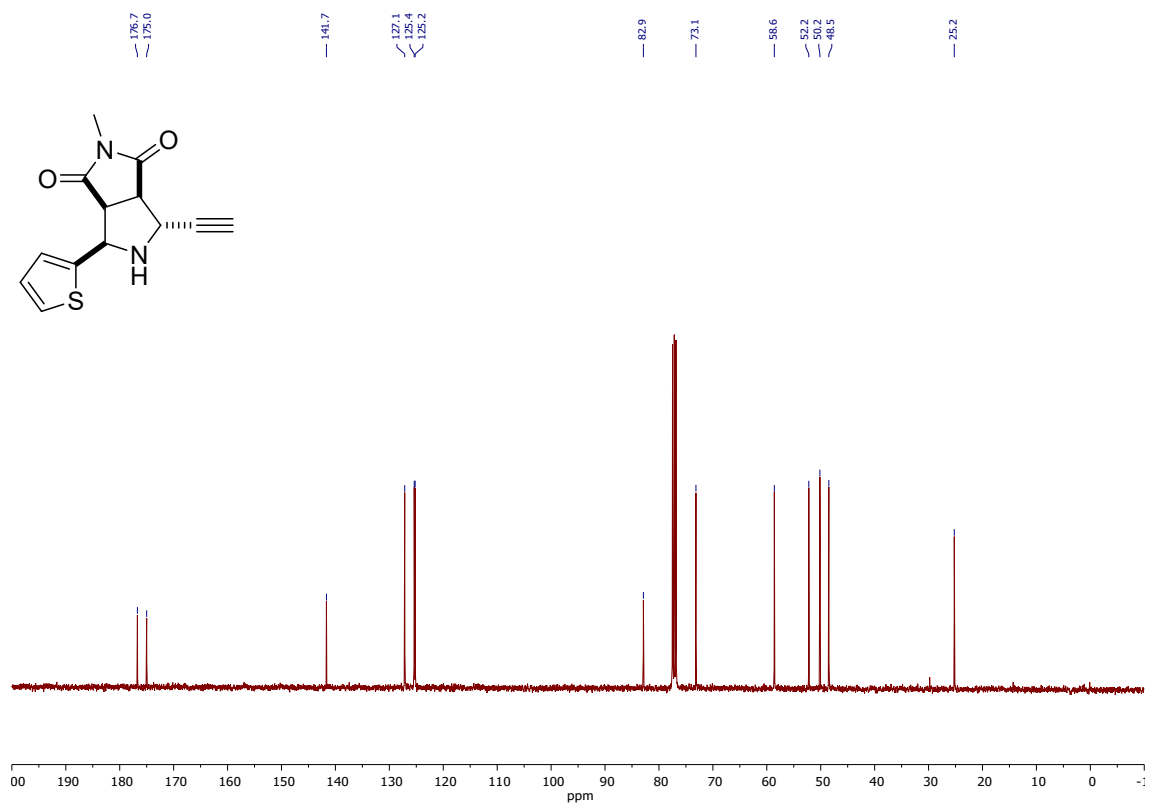

**<sup>1</sup>H NMR of 2ia**

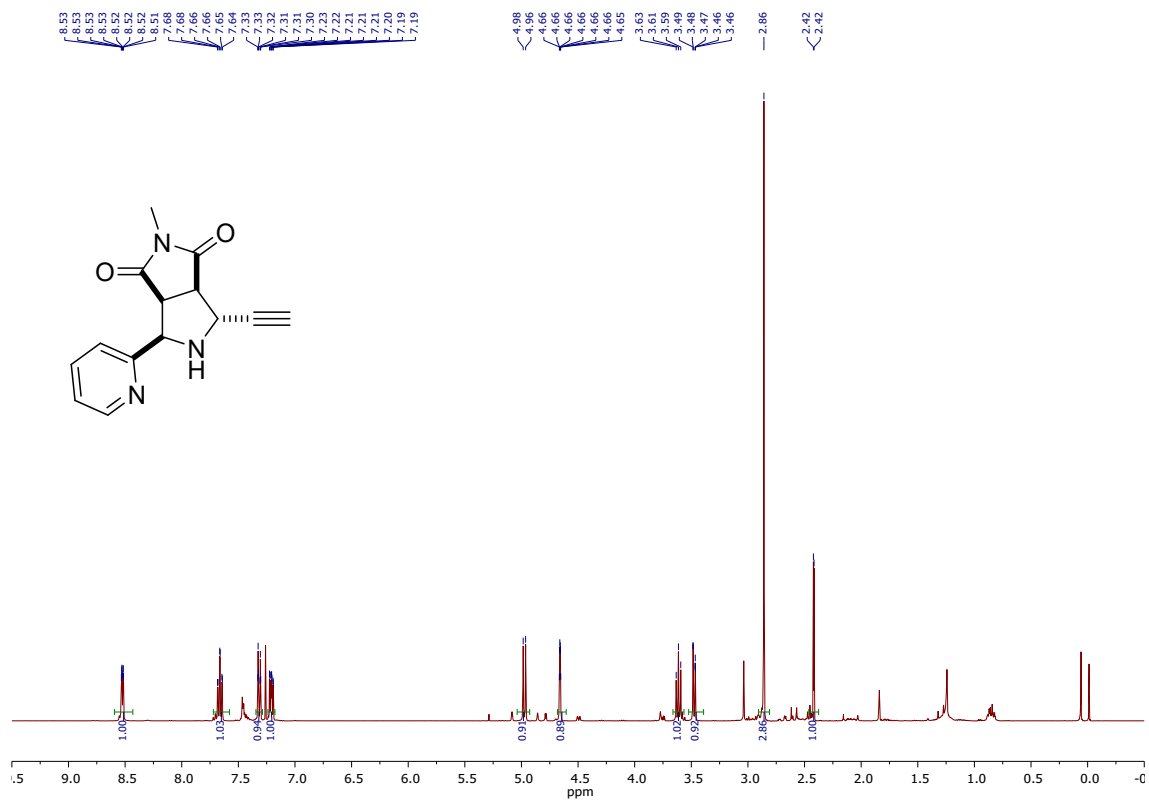

$^{13}\text{C}\{\text{H}\}$  NMR of **2ia**

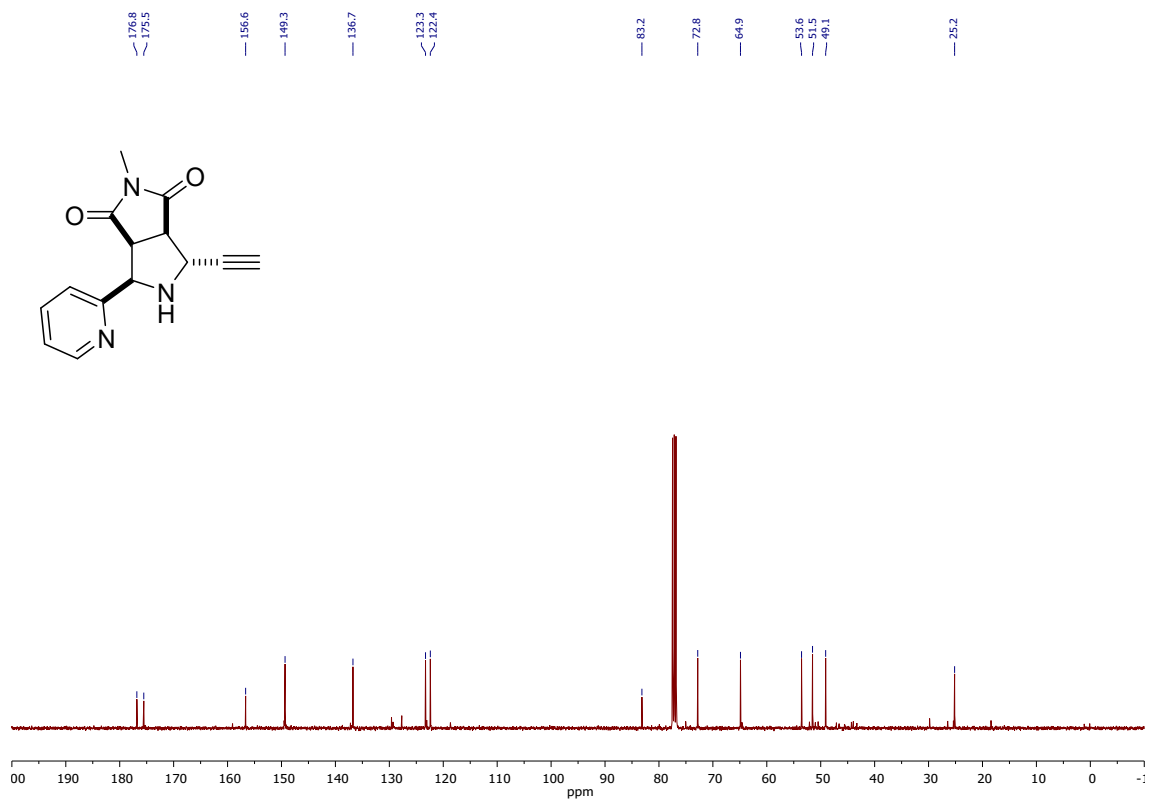

$^1\text{H}$  NMR of **2ae**

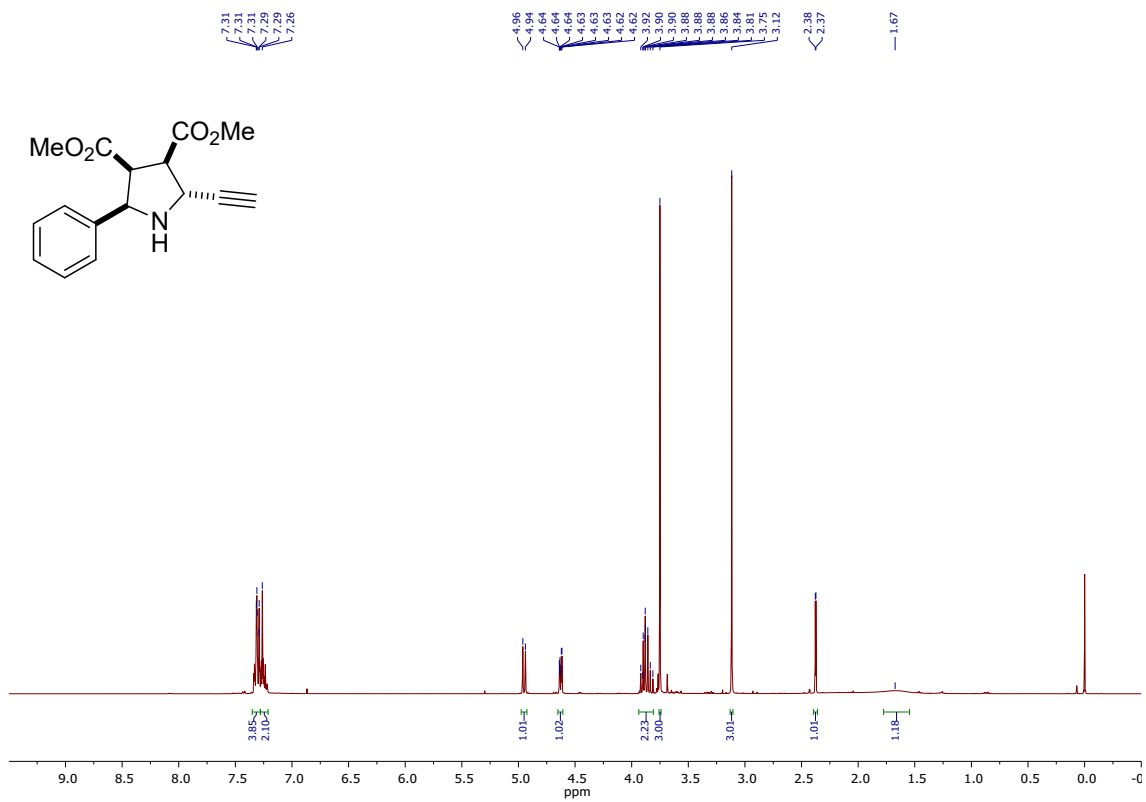

**<sup>13</sup>C{H} NMR of 2ae**

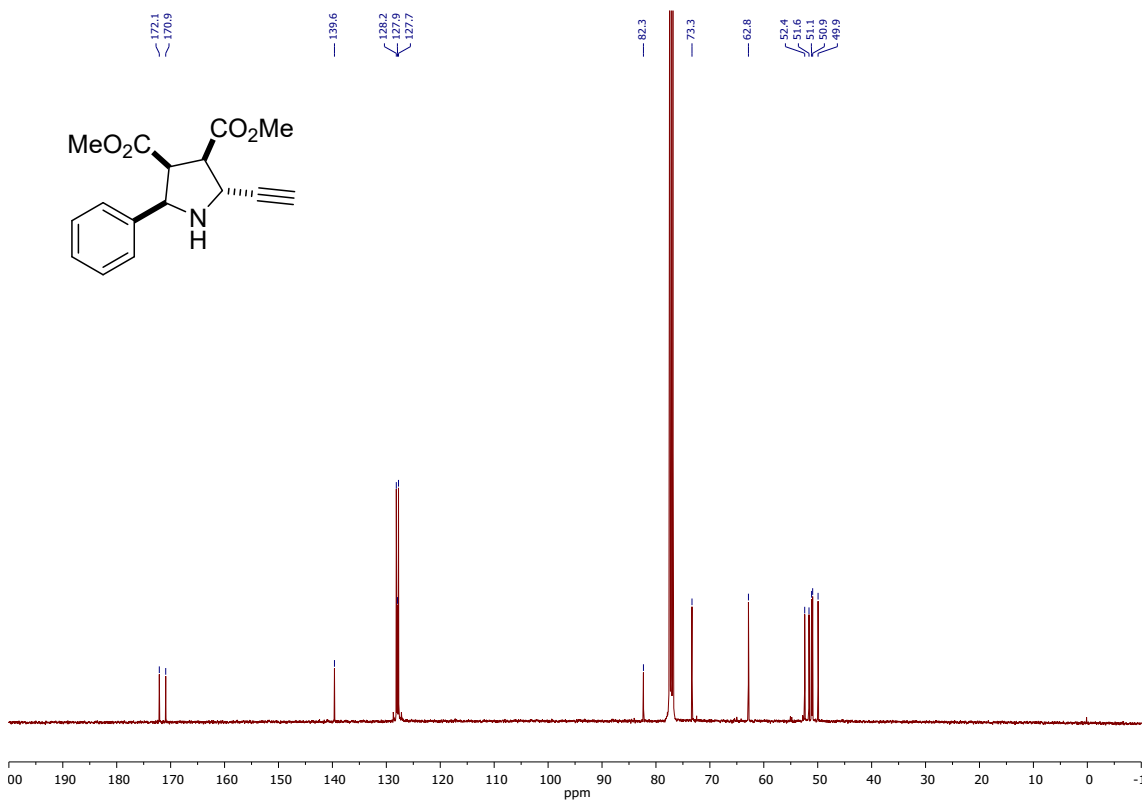

**NOESY of 2ae**

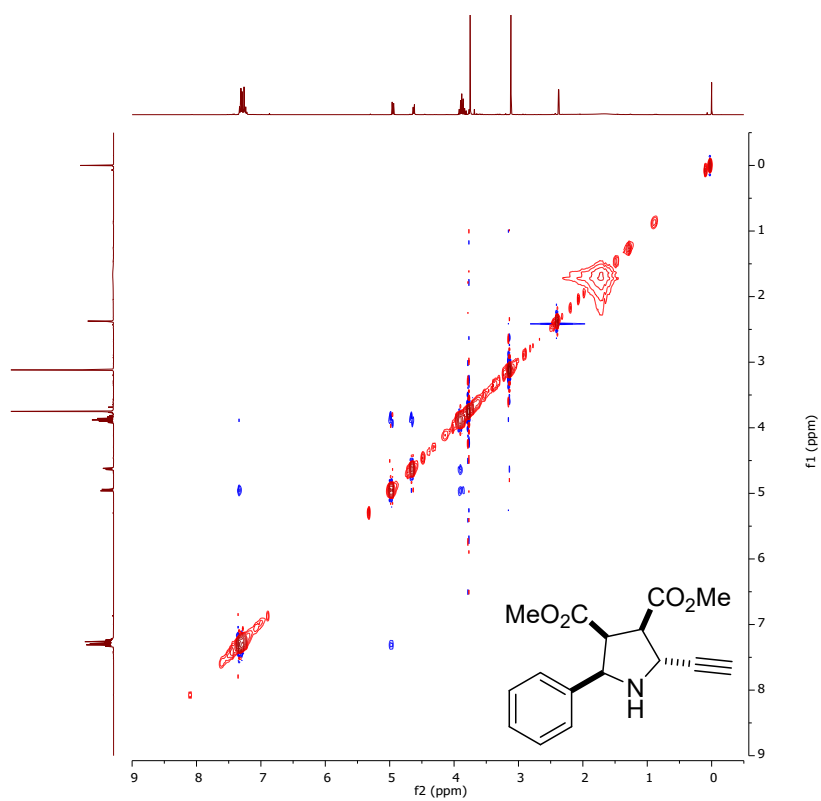

<sup>1</sup>H NMR of 2af

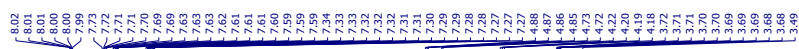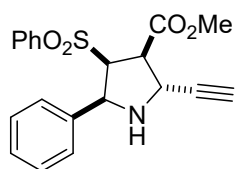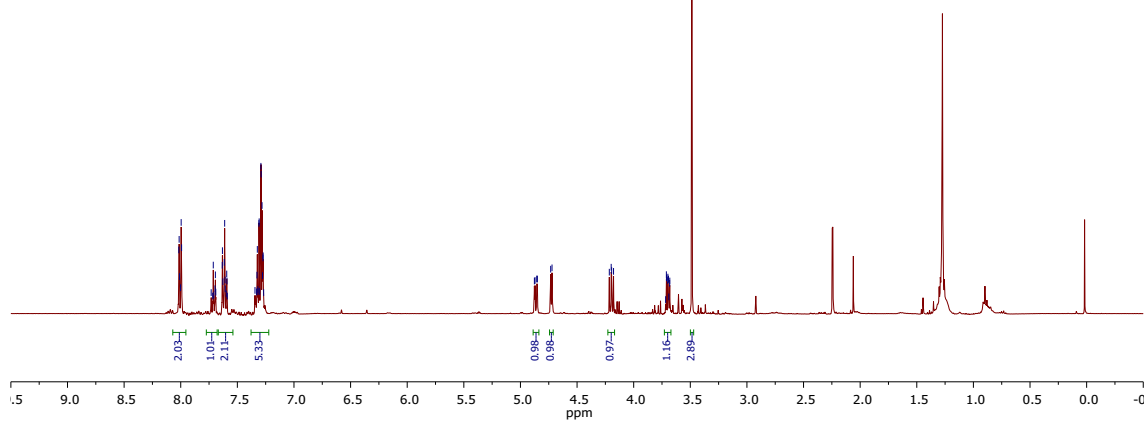

<sup>13</sup>C{<sup>1</sup>H} NMR of 2af



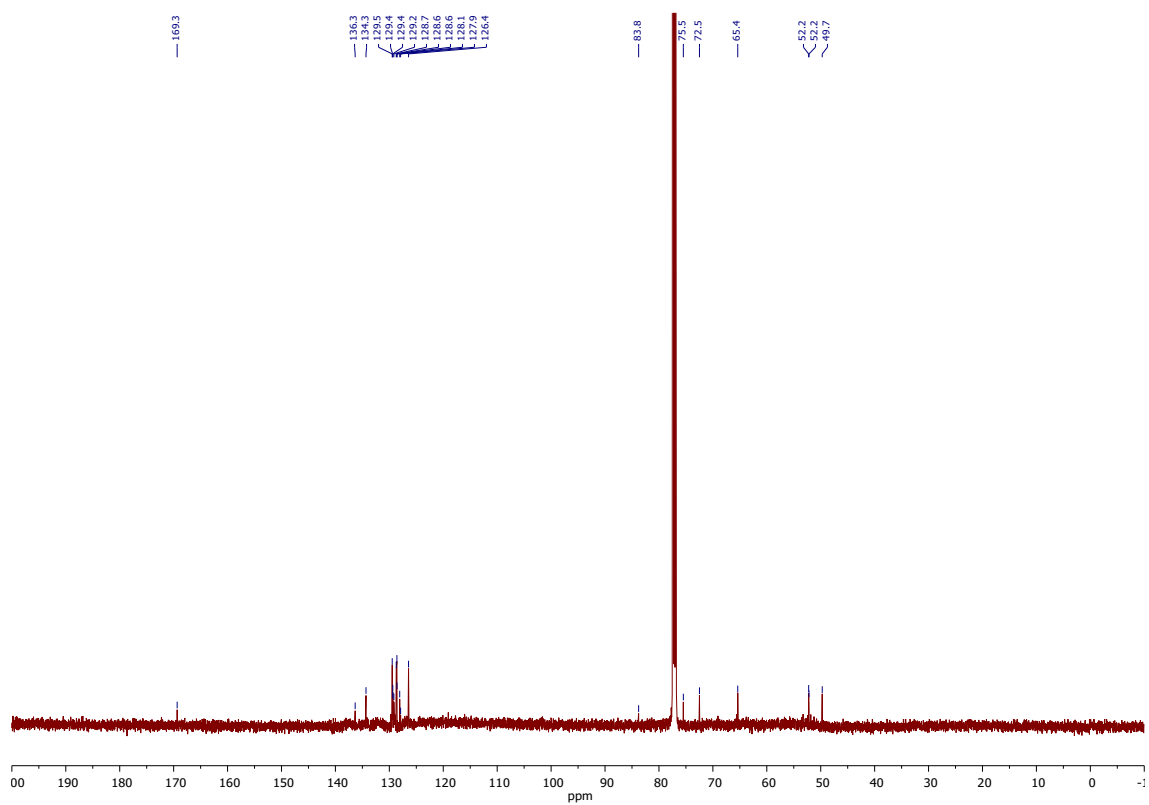

**<sup>1</sup>H NMR of 2ag**

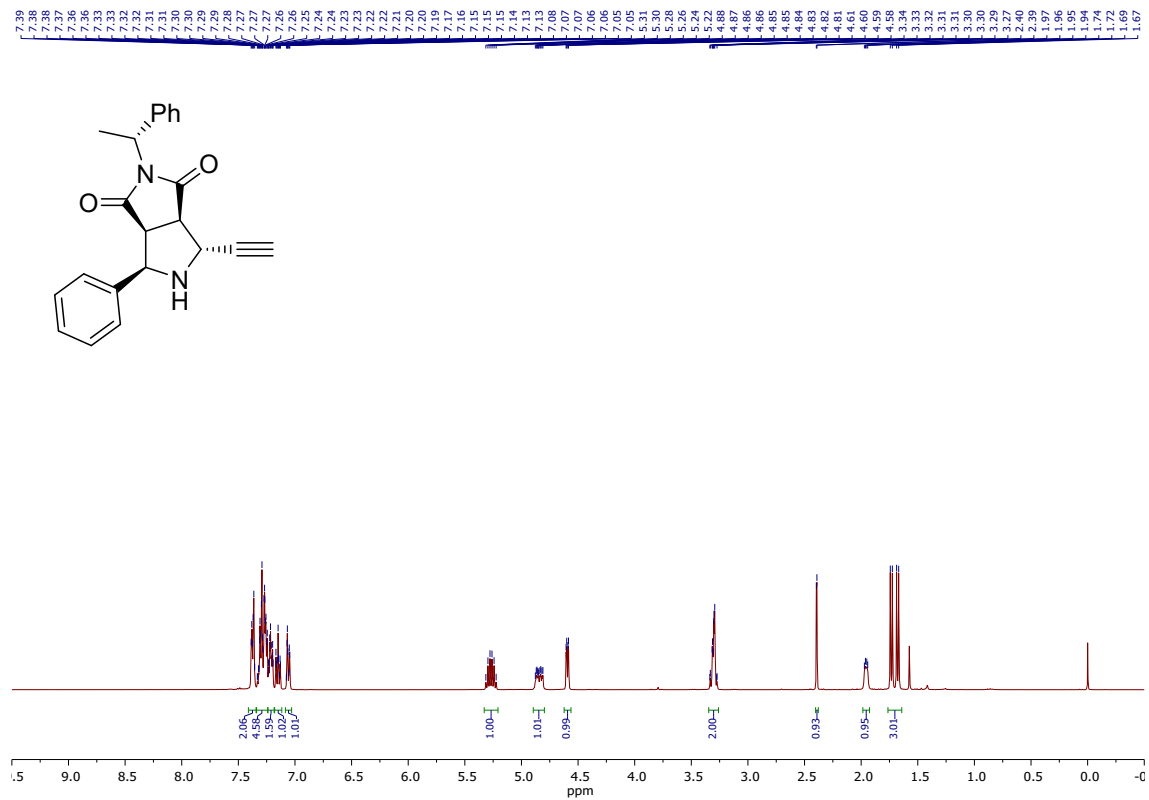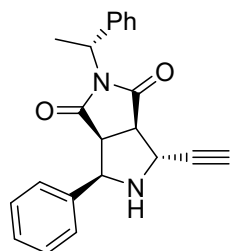

**<sup>13</sup>C{<sup>1</sup>H} NMR of 2ag**

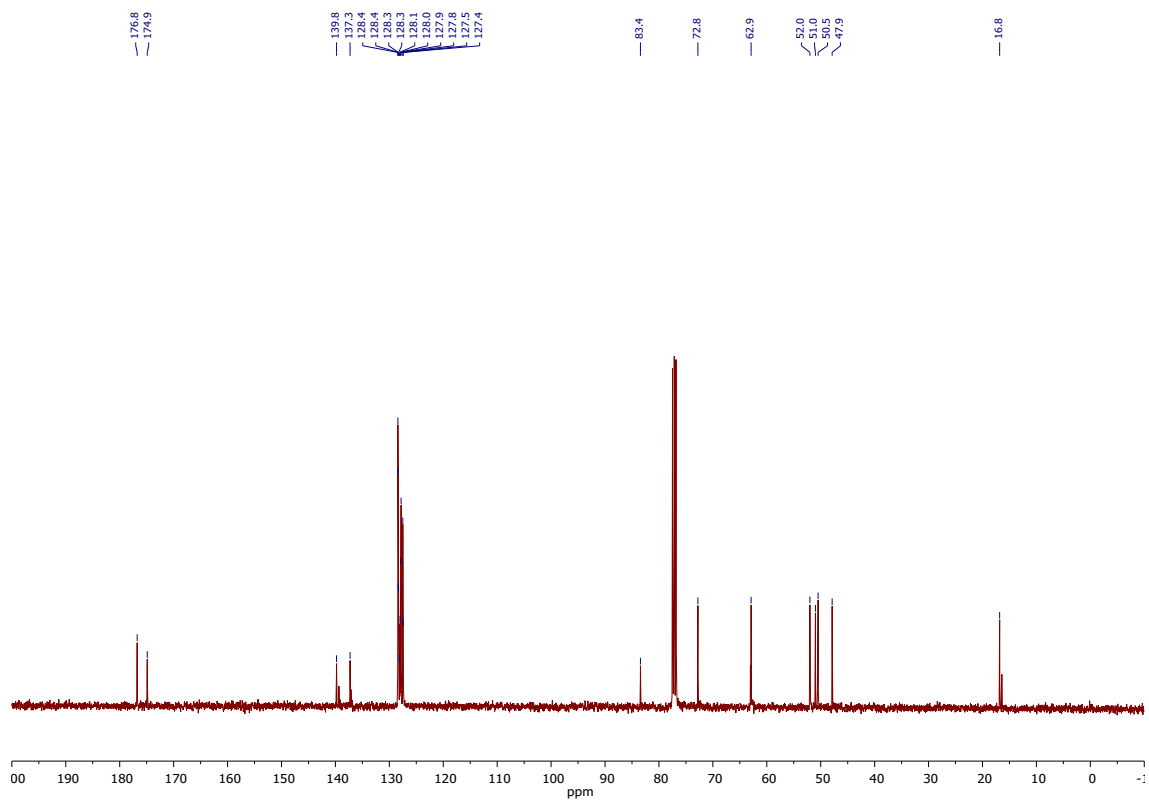

**<sup>1</sup>H NMR of 3aa**

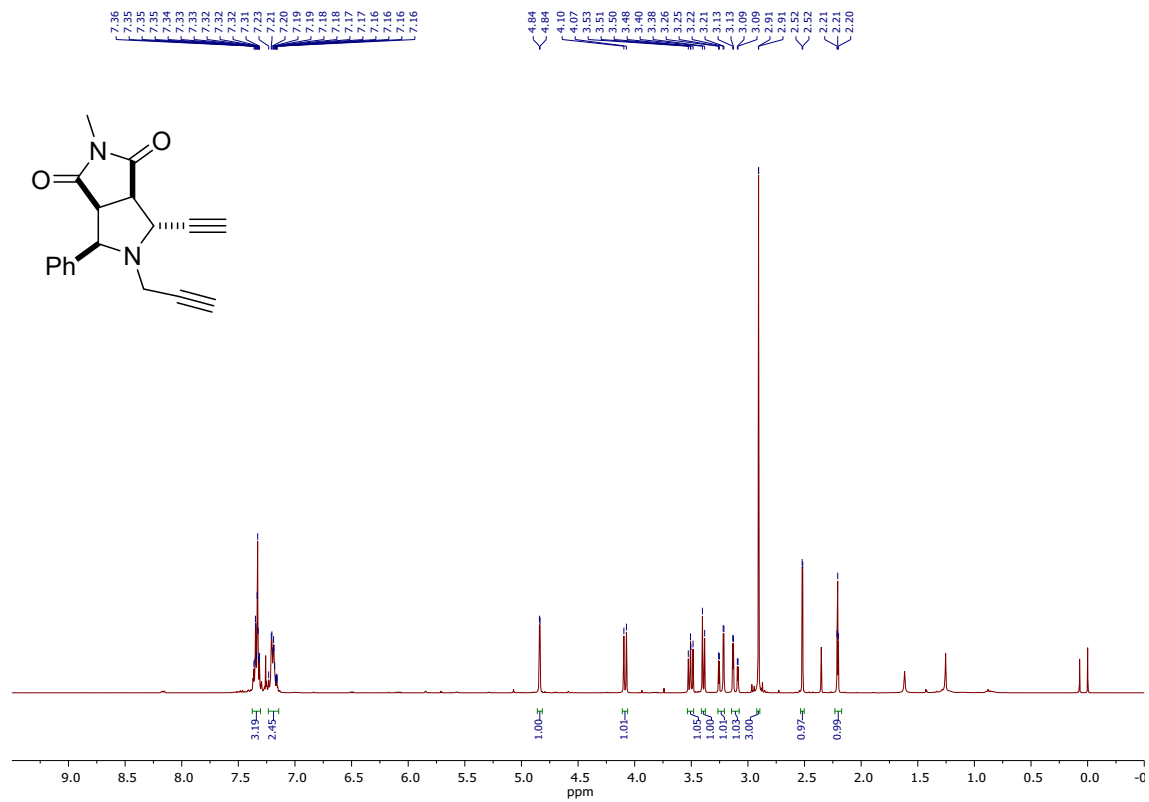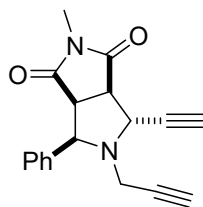

**<sup>13</sup>C{<sup>1</sup>H} NMR of 3aa**

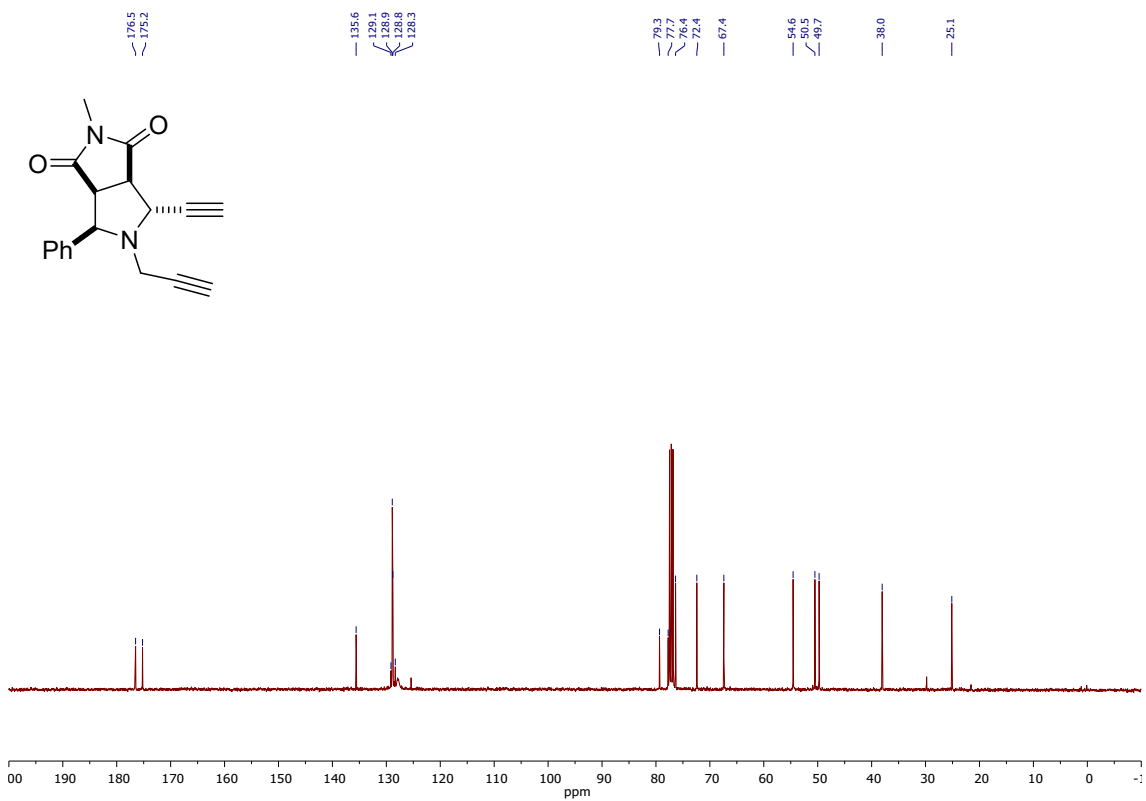

**<sup>1</sup>H NMR of 3ba**

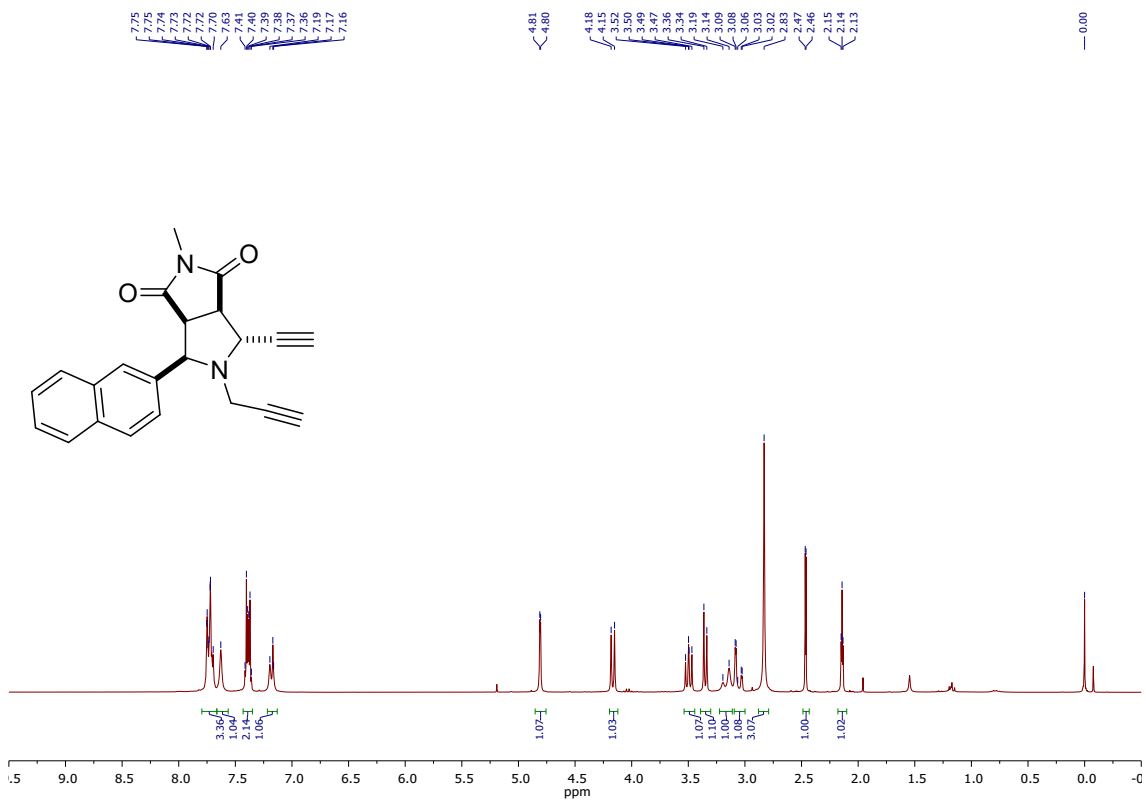

**<sup>13</sup>C{<sup>1</sup>H} NMR of 3ba**

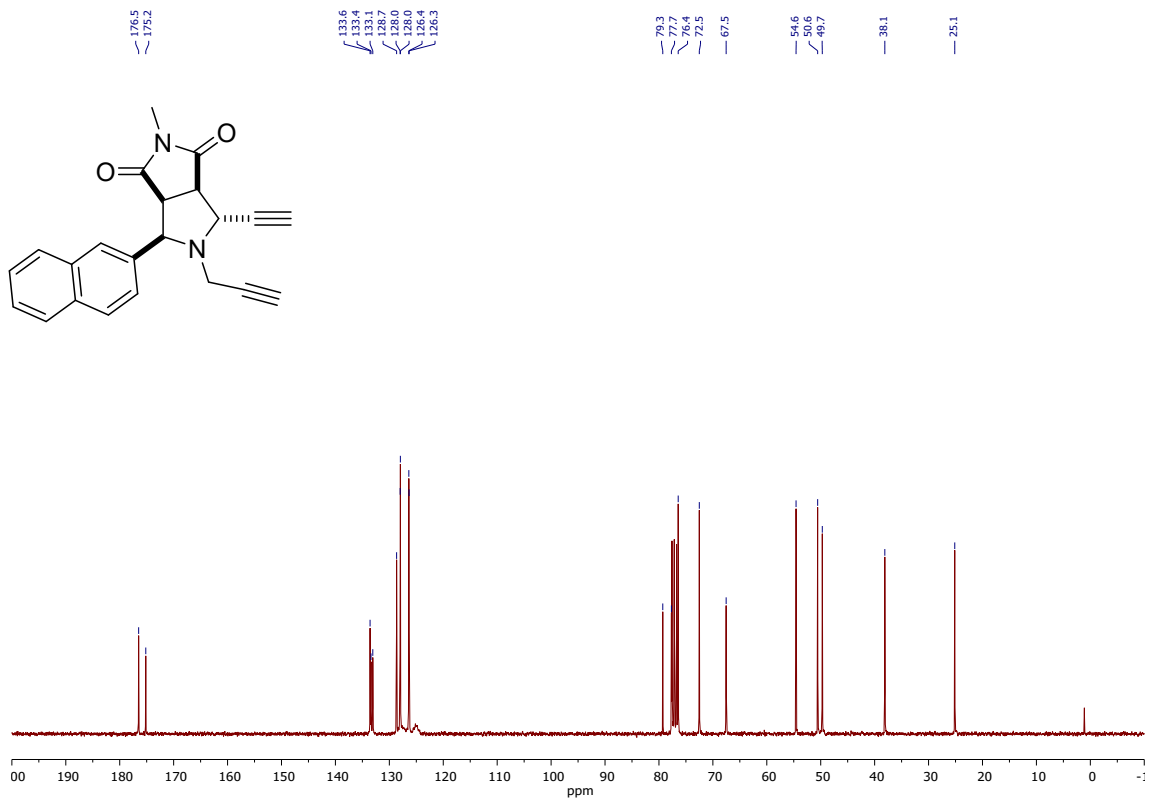

<sup>1</sup>H NMR of **3da**

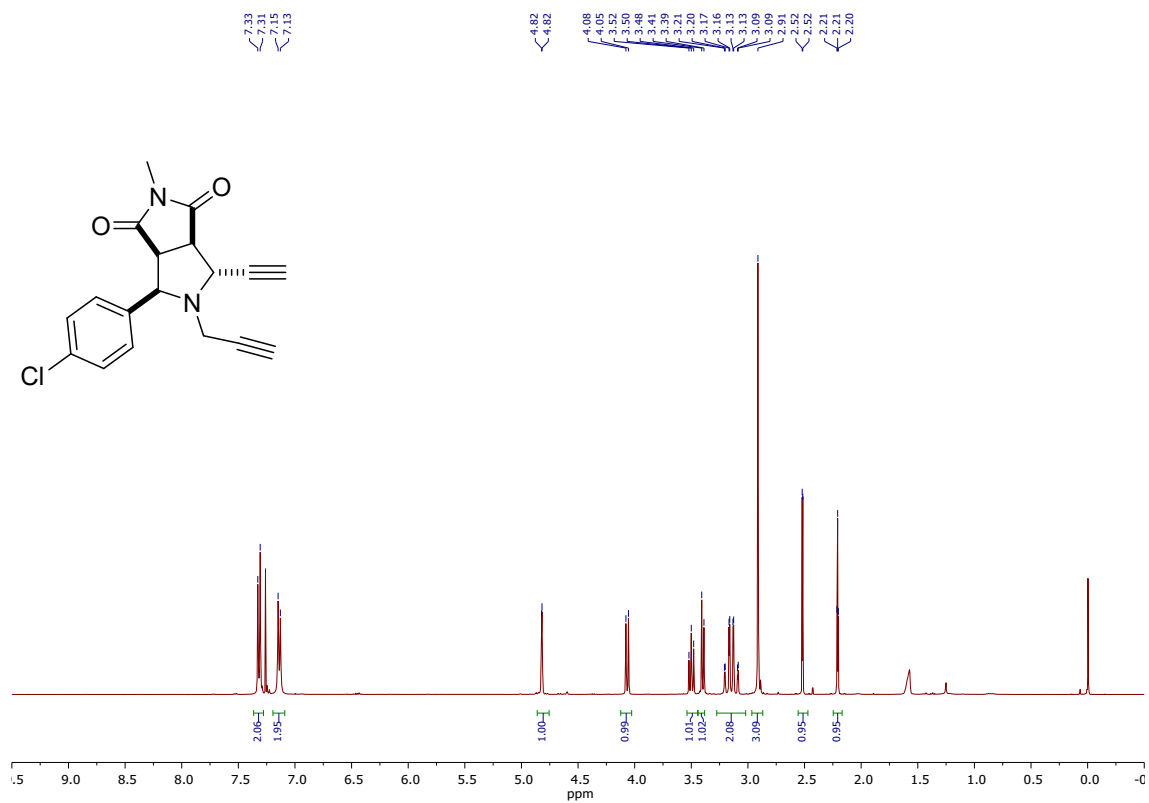

<sup>13</sup>C{<sup>1</sup>H} NMR of **3da**

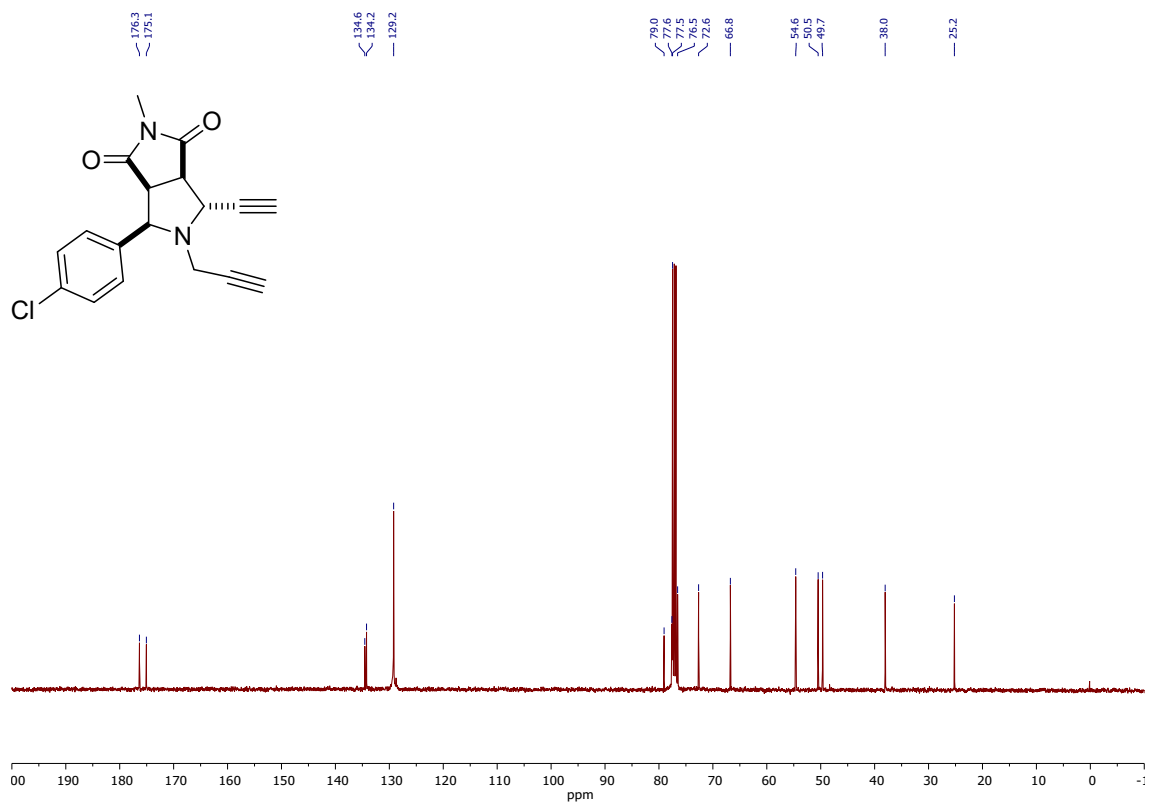

**<sup>1</sup>H NMR of 3ga**

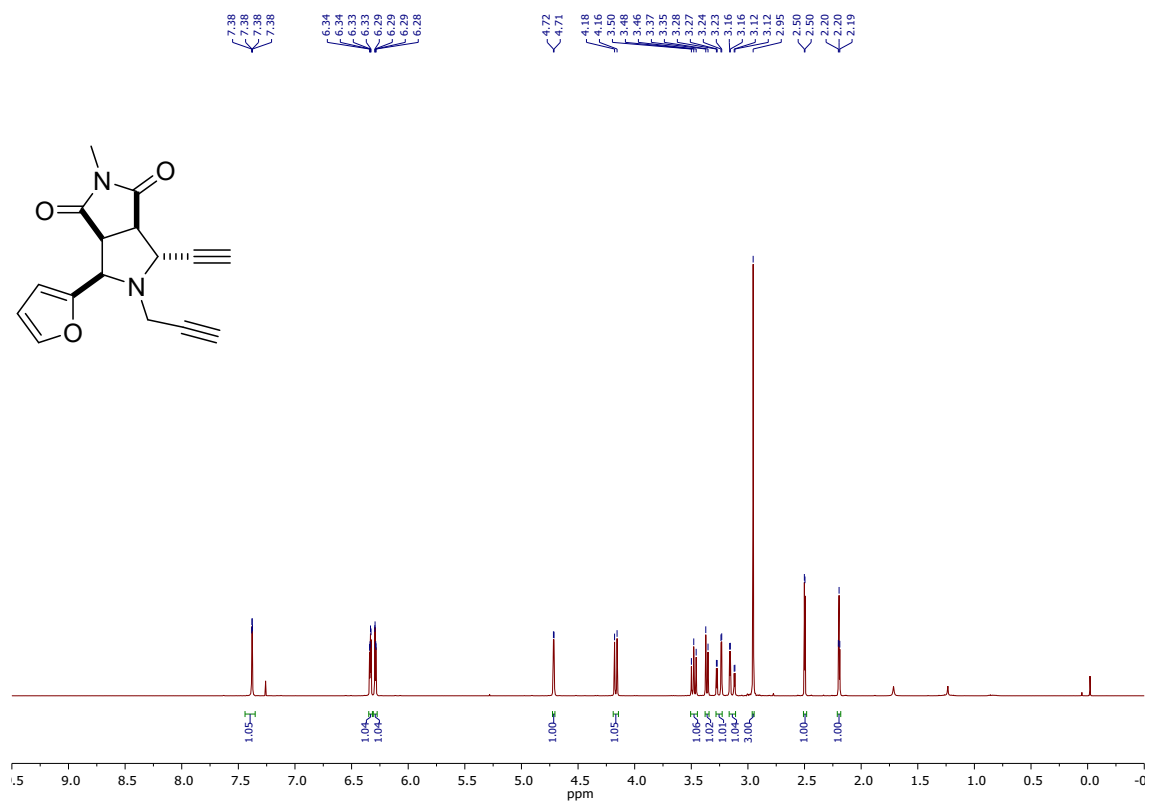

**<sup>13</sup>C{<sup>1</sup>H} NMR of 3ga**

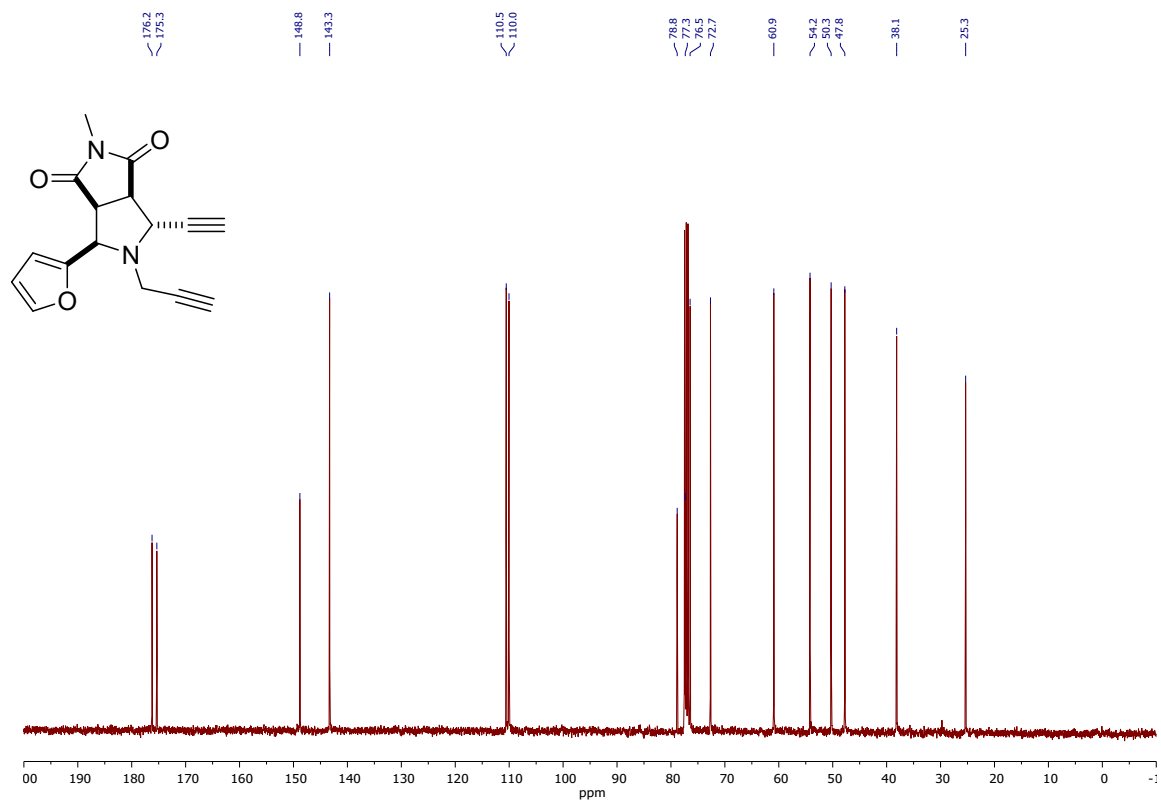

**<sup>1</sup>H NMR of 4aa**

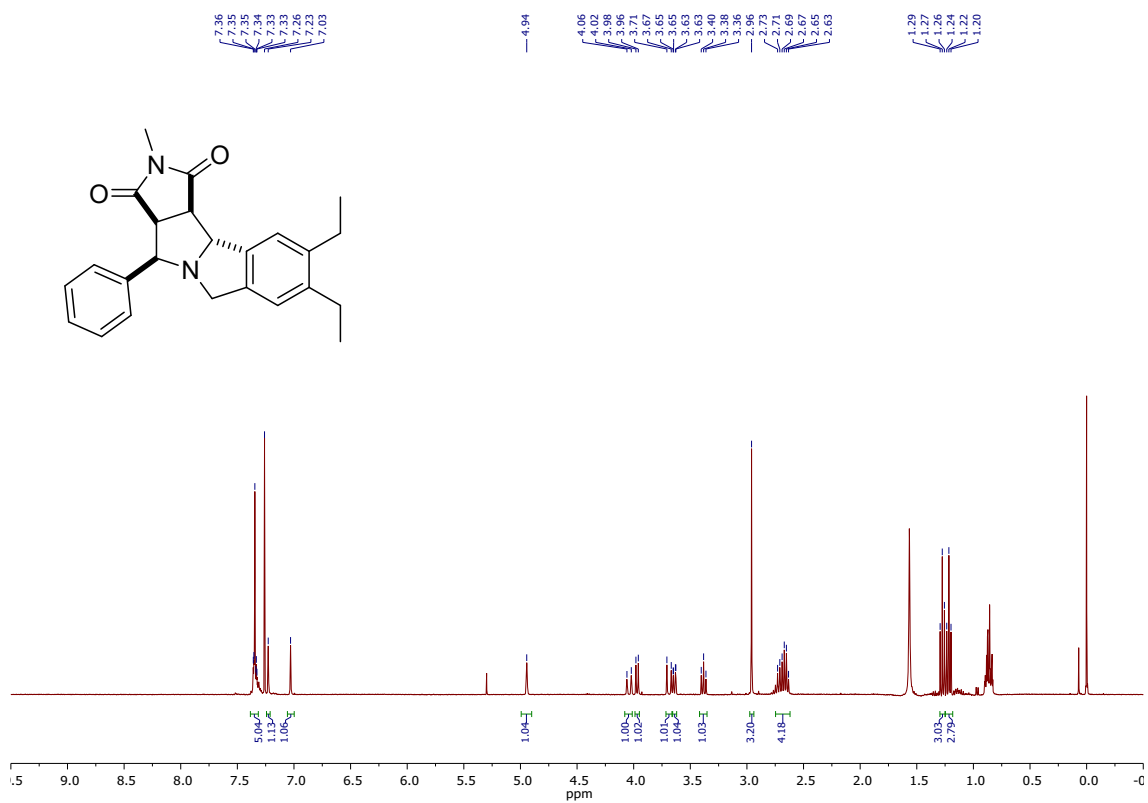

**<sup>13</sup>C{<sup>1</sup>H} NMR of 4aa**

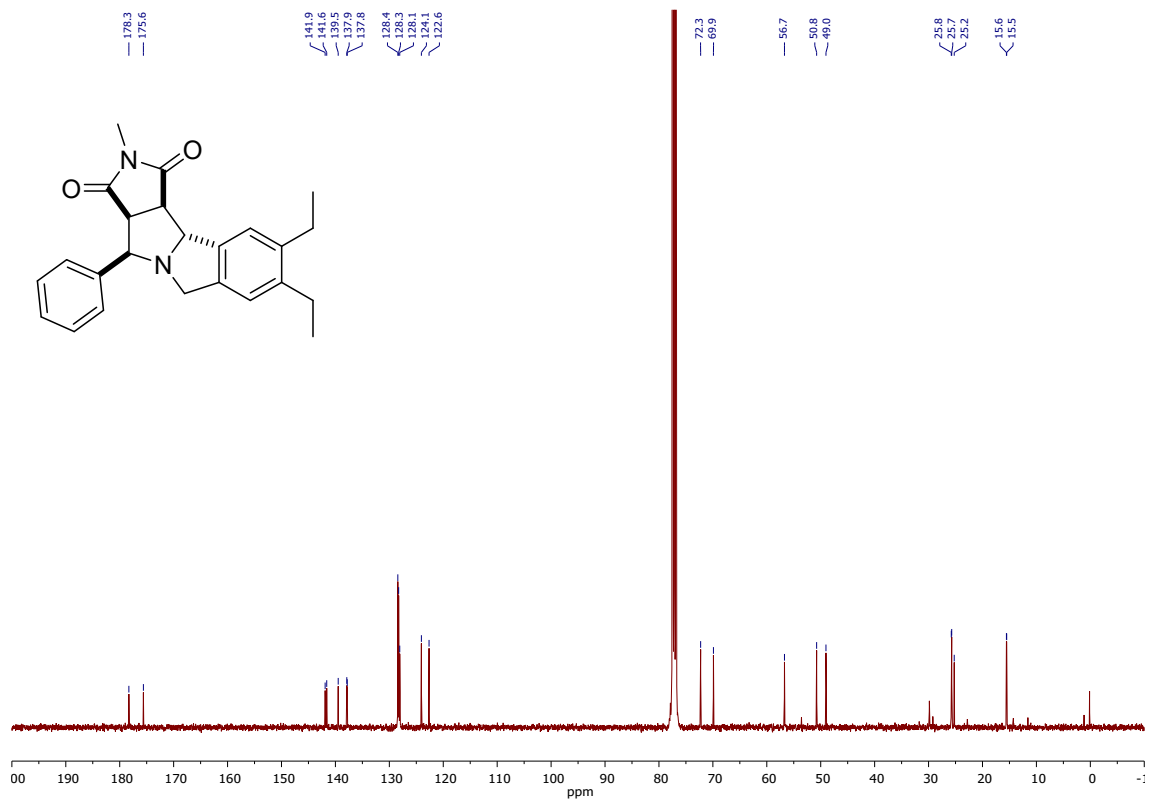

**<sup>1</sup>H NMR of 4ab**

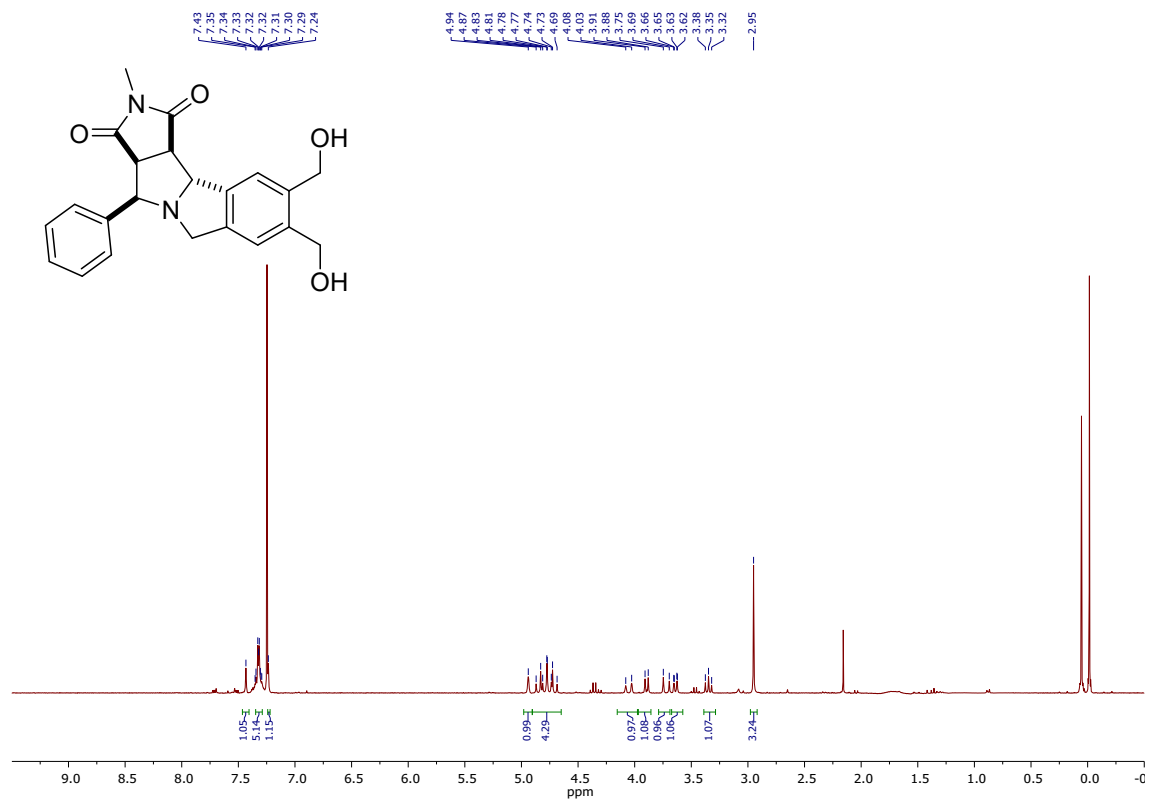

**<sup>13</sup>C{<sup>1</sup>H} NMR of 4ab**

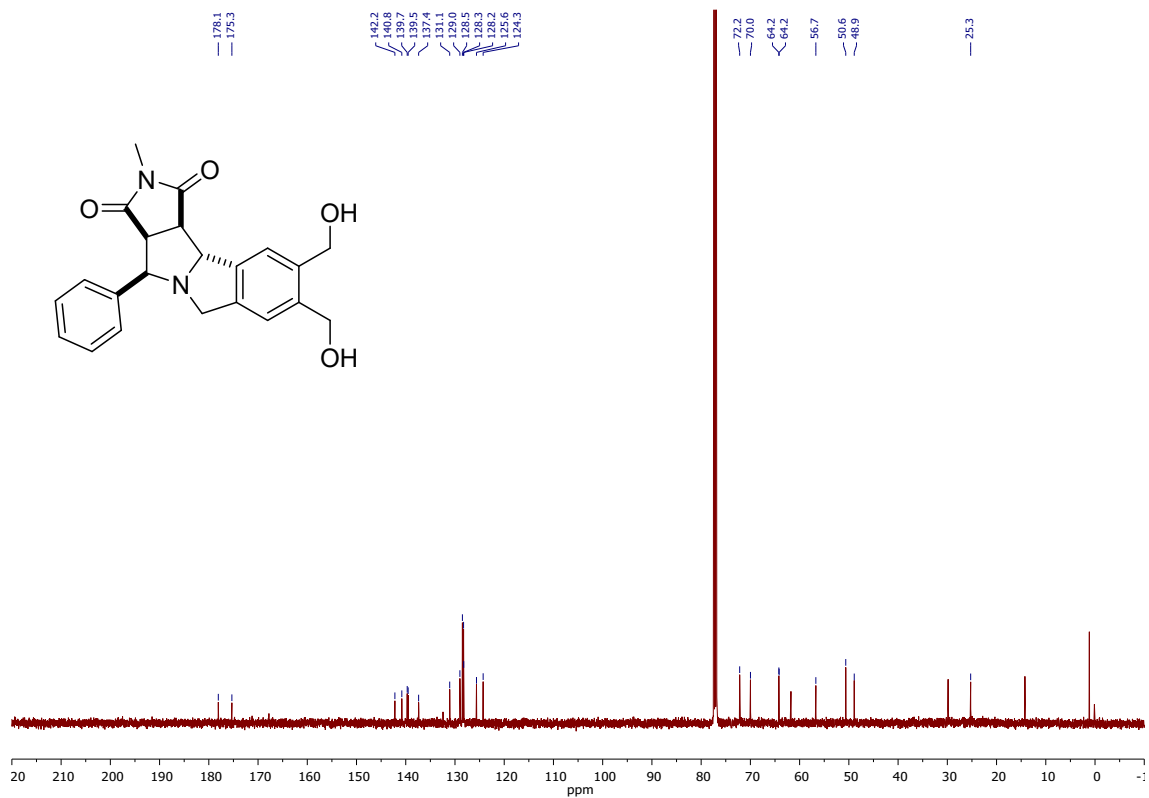

**<sup>1</sup>H NMR of 4ba**

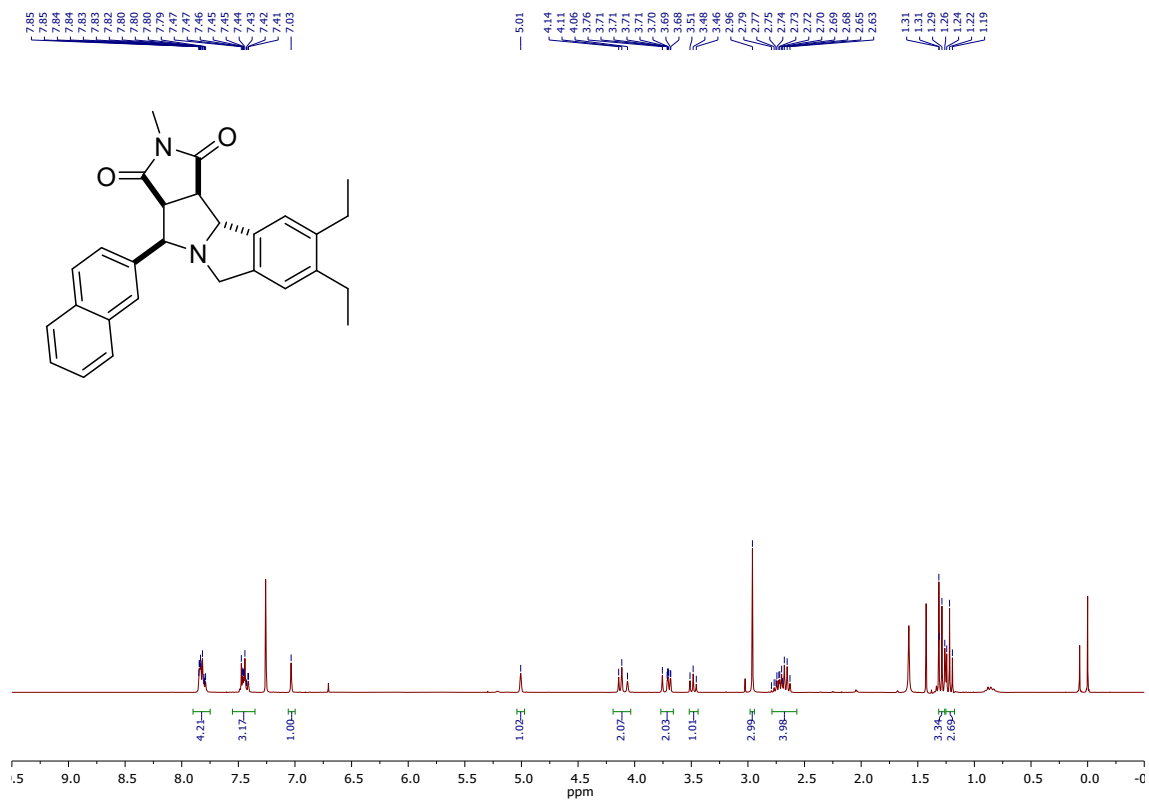

**<sup>13</sup>C{<sup>1</sup>H} NMR of 4ba**



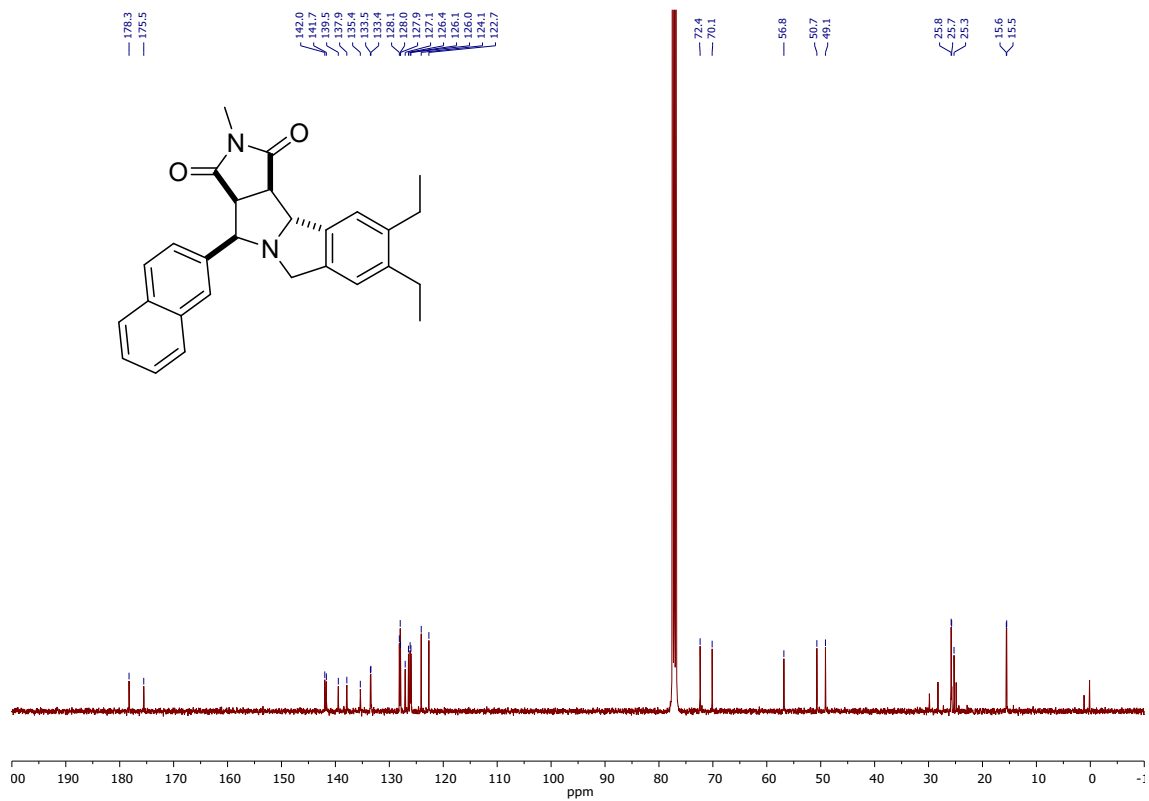

**<sup>1</sup>H NMR of 4bc**

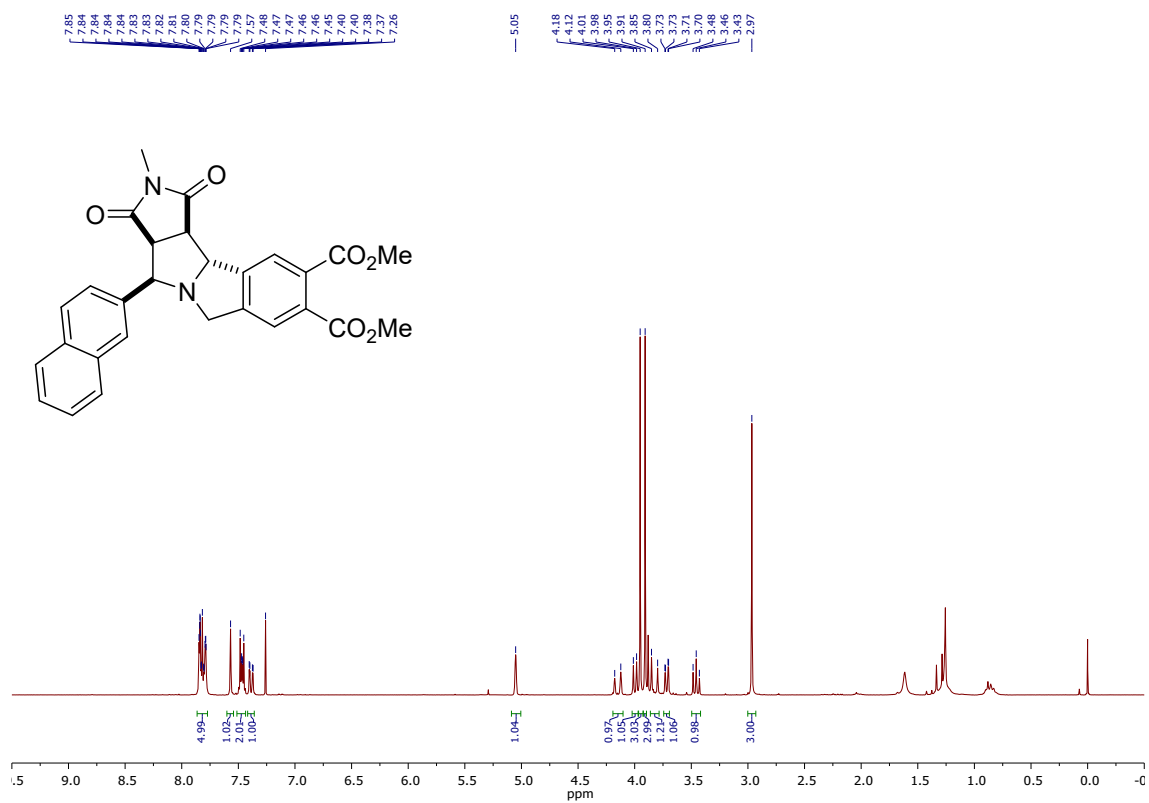

### $^{13}\text{C}\{^1\text{H}\}$ NMR of **4bc**

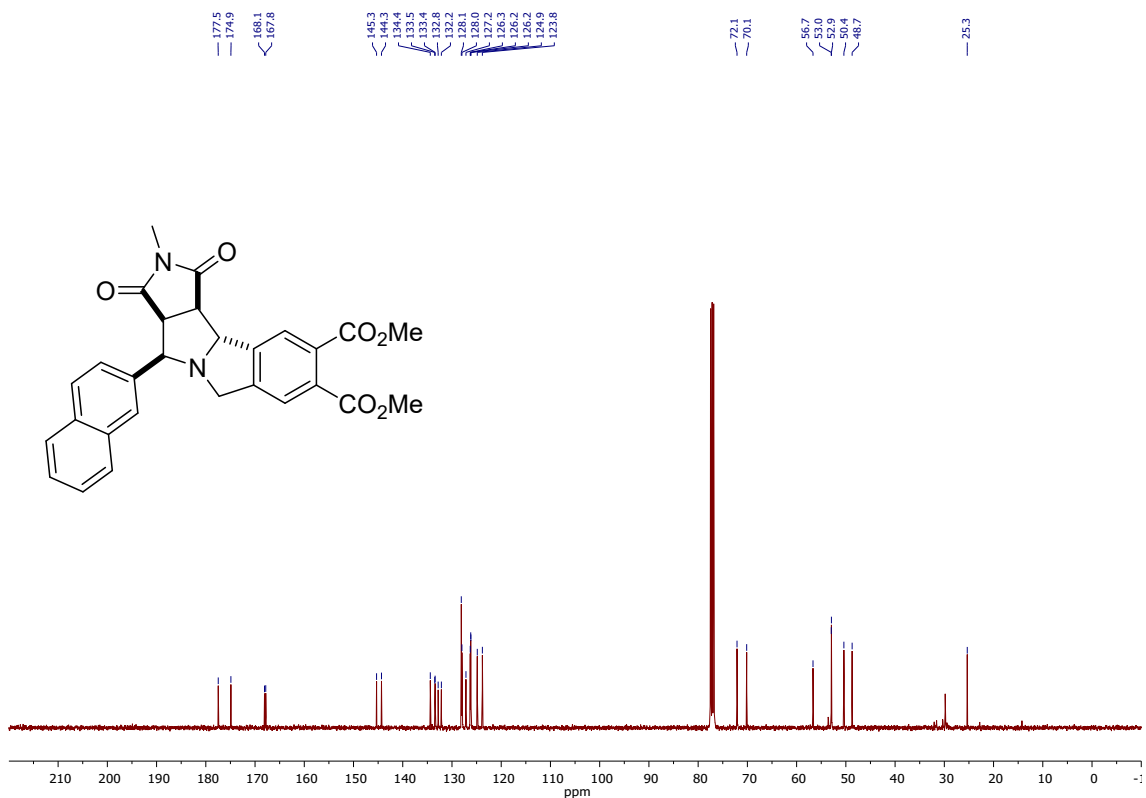

### $^1\text{H}$ NMR of **4da**

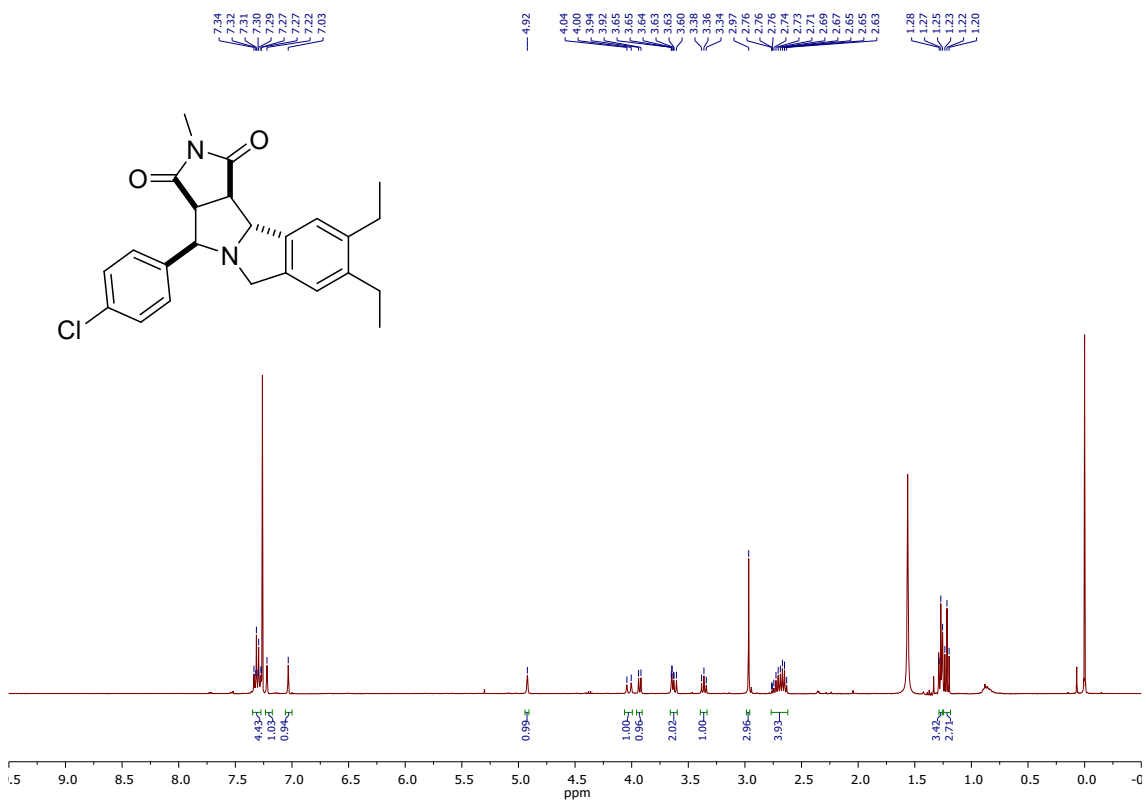

### $^{13}\text{C}\{^1\text{H}\}$ NMR of **4da**

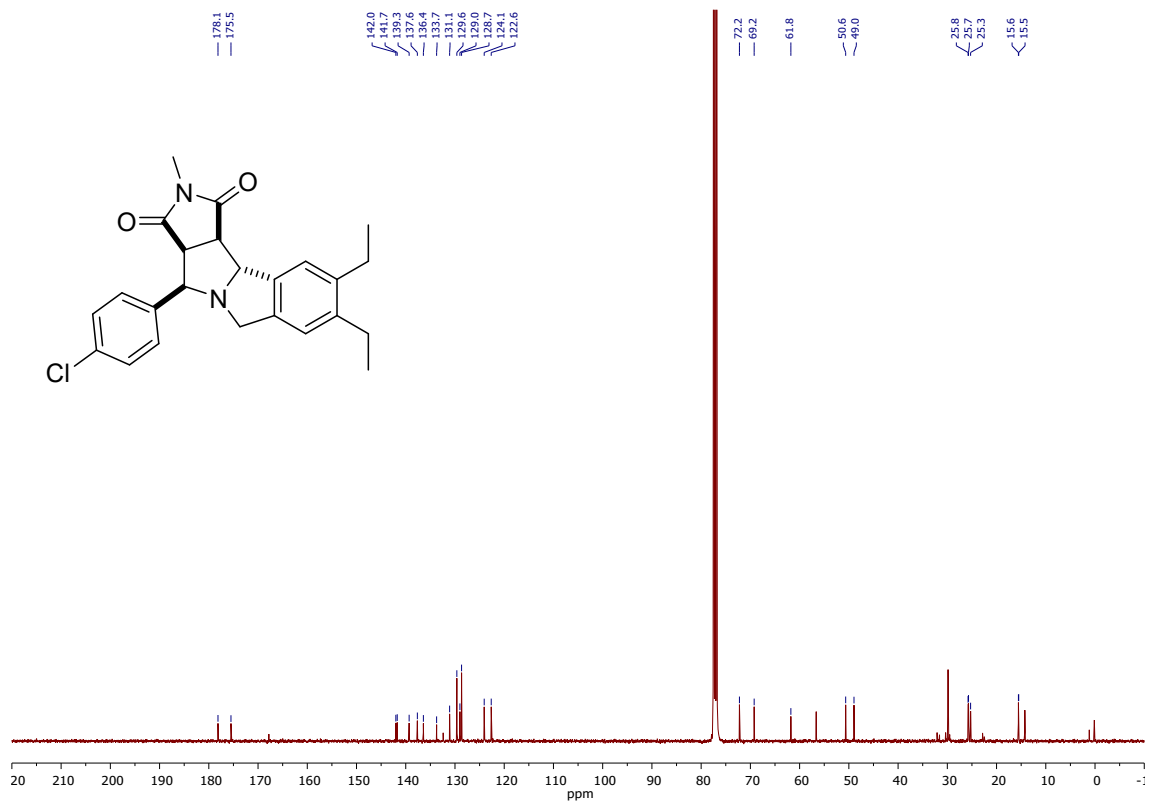

**<sup>1</sup>H NMR of 4db**

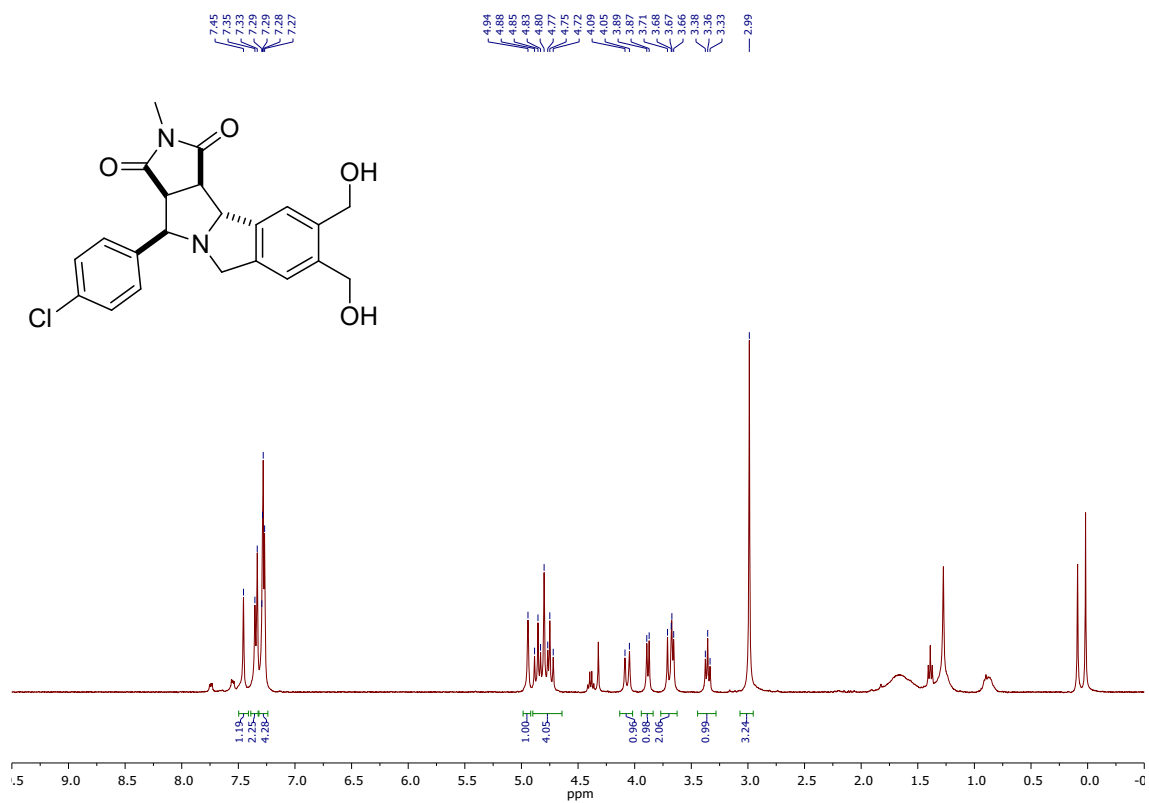

**<sup>13</sup>C{H} NMR of 4db**

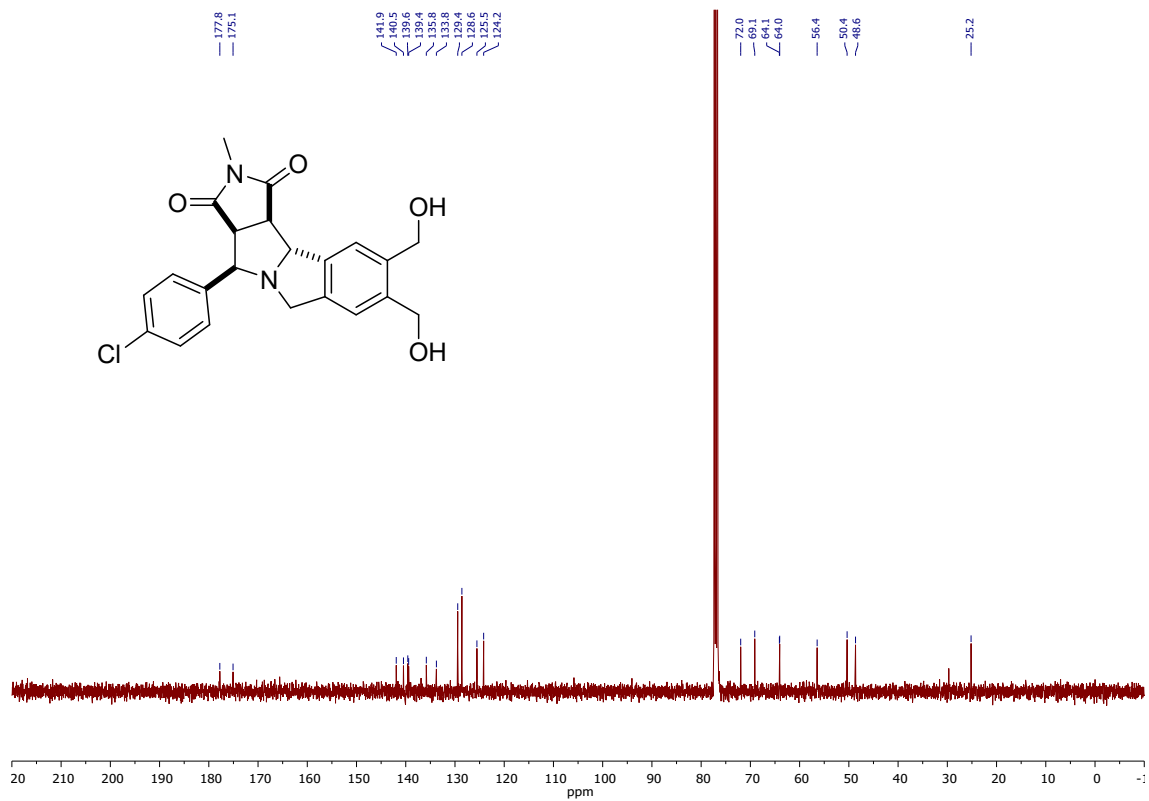

**<sup>1</sup>H NMR of 5ba**

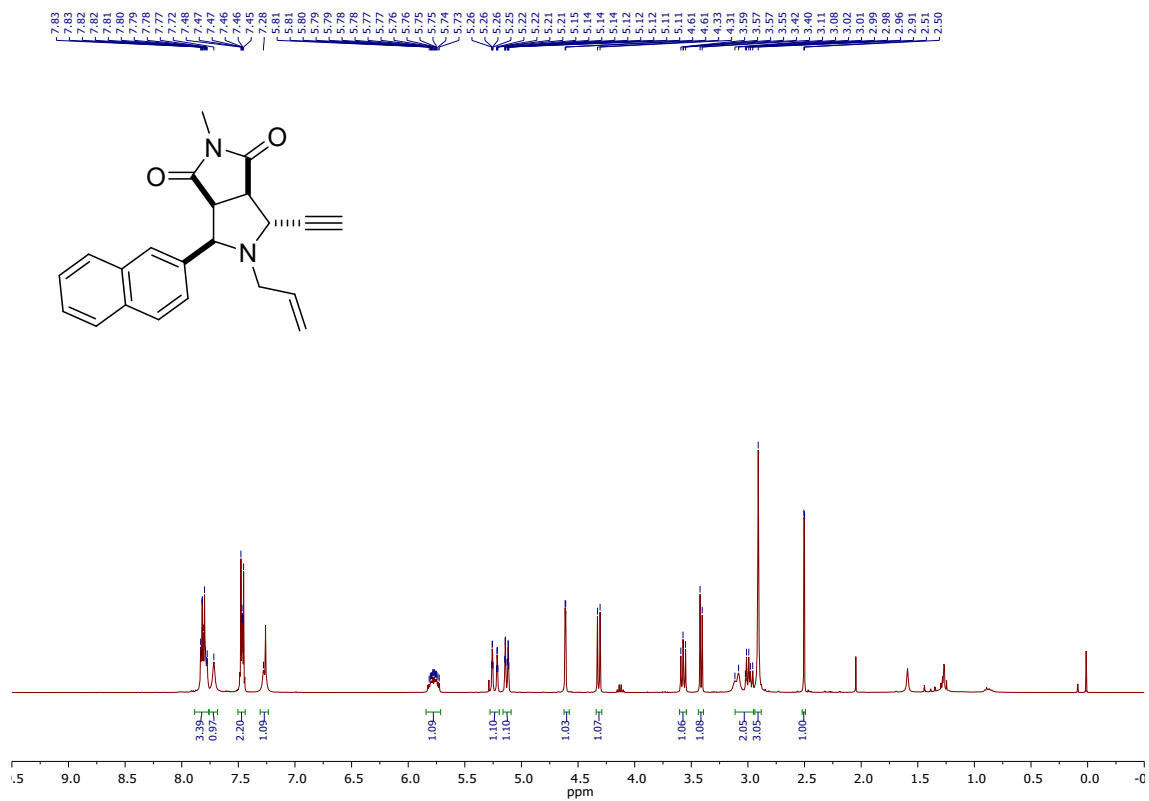

**<sup>13</sup>C{H} NMR of 5ba**

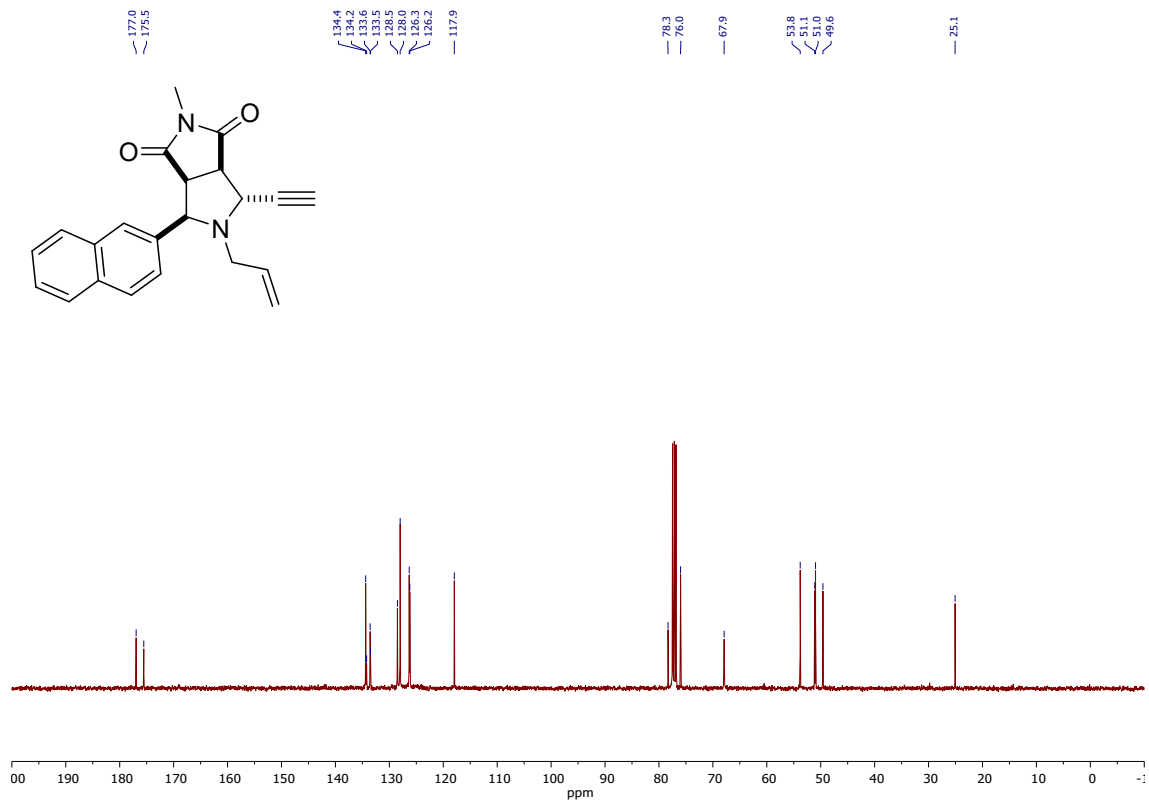

**<sup>1</sup>H NMR of 5da**

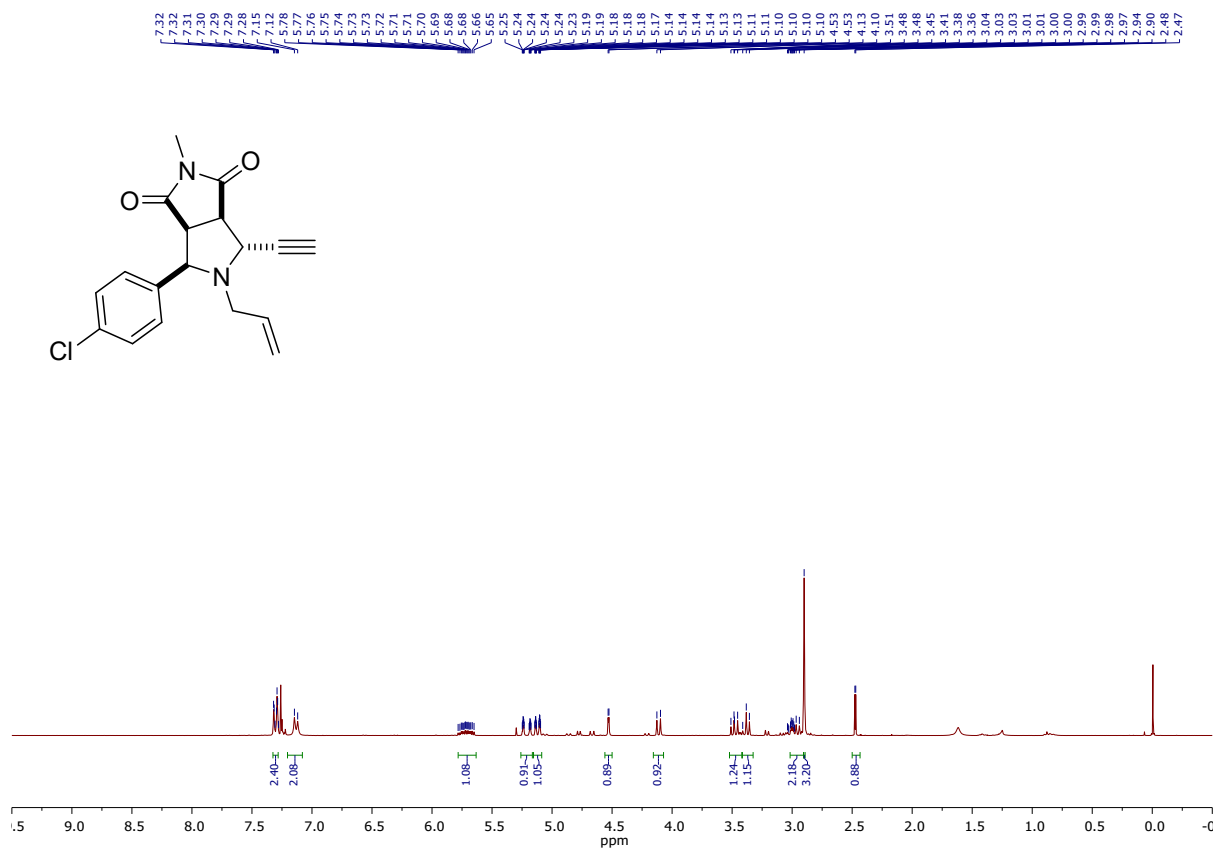

### $^{13}\text{C}\{\text{H}\}$ NMR of 5da

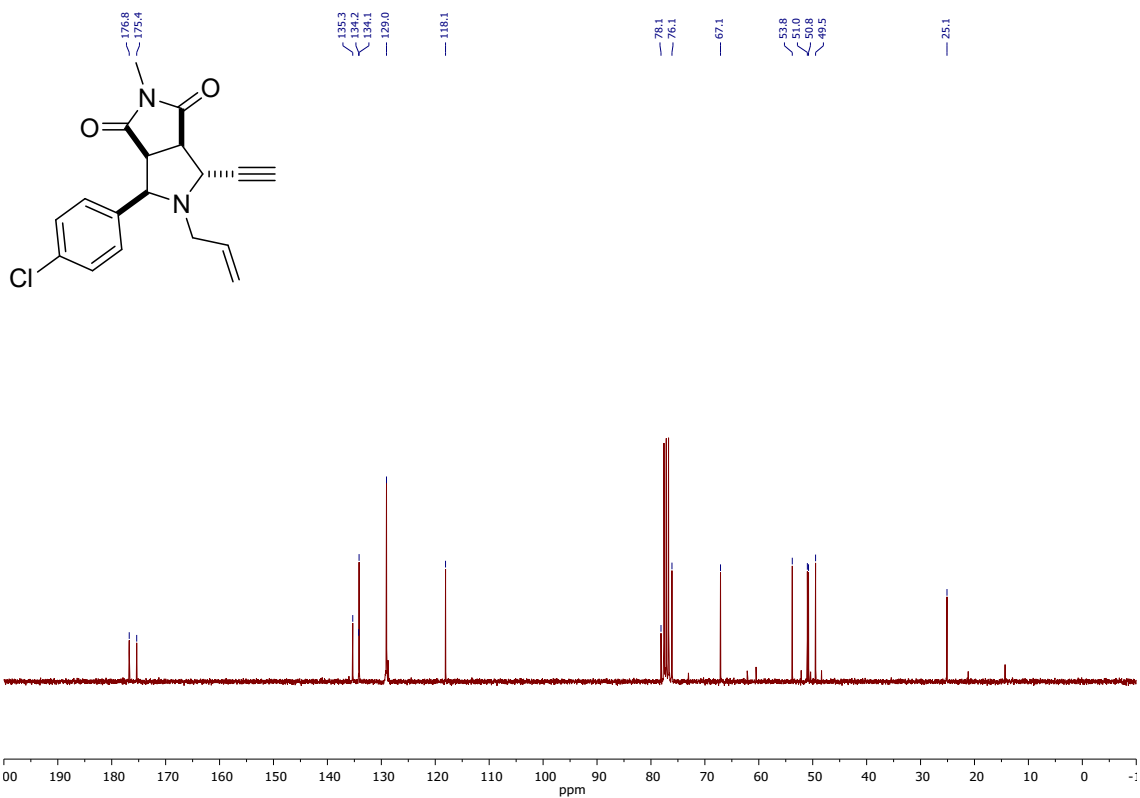

### $^1\text{H}$ NMR of 6da

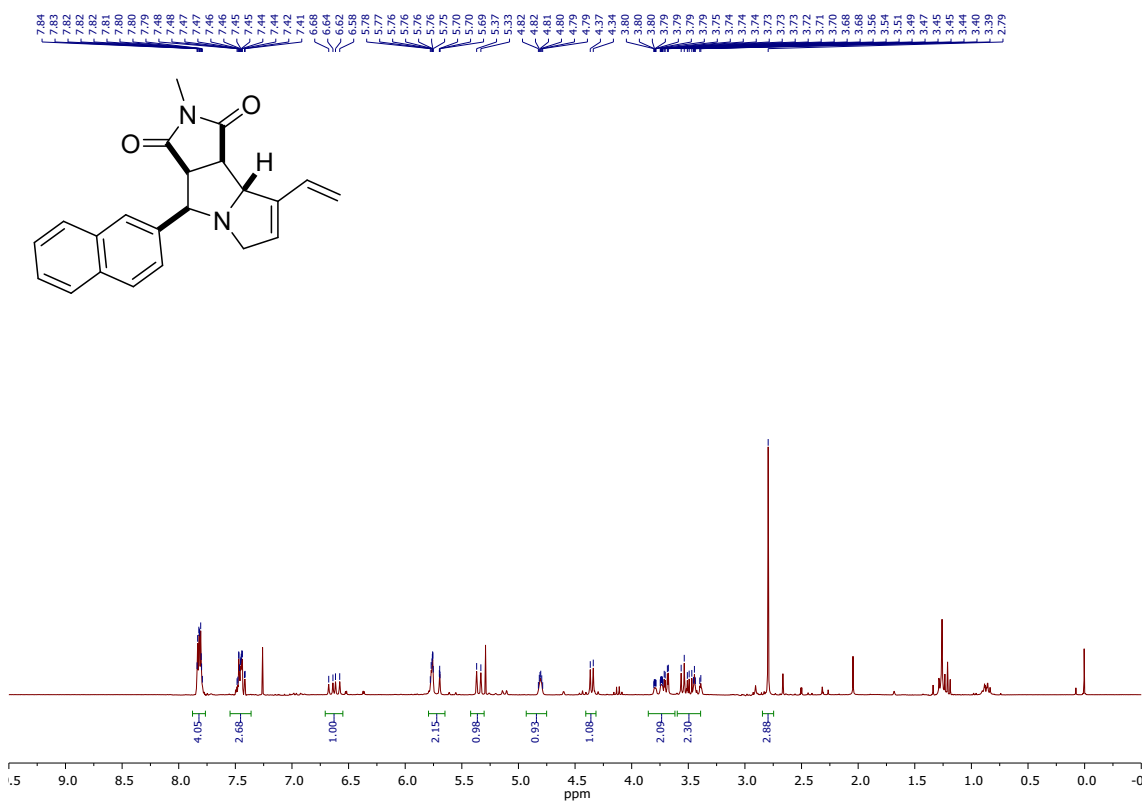

### $^{13}\text{C}\{^1\text{H}\}$ NMR of **6da**

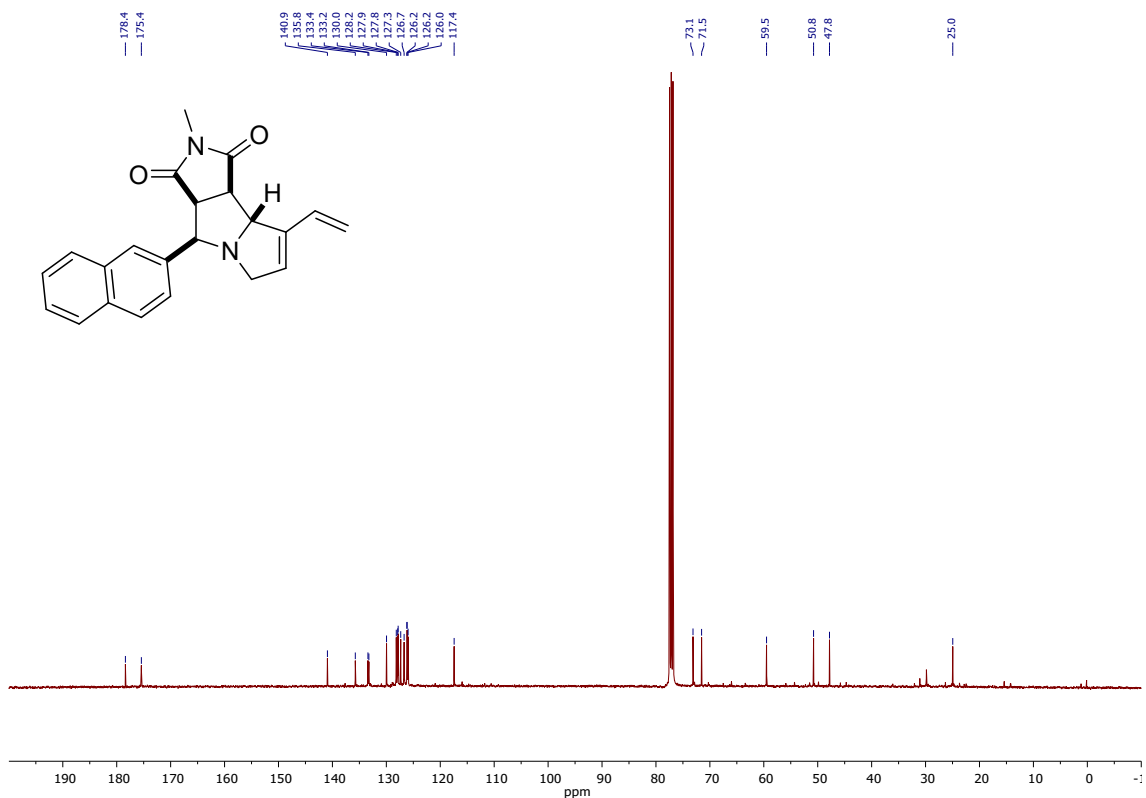

### $^1\text{H}$ NMR of **6db**

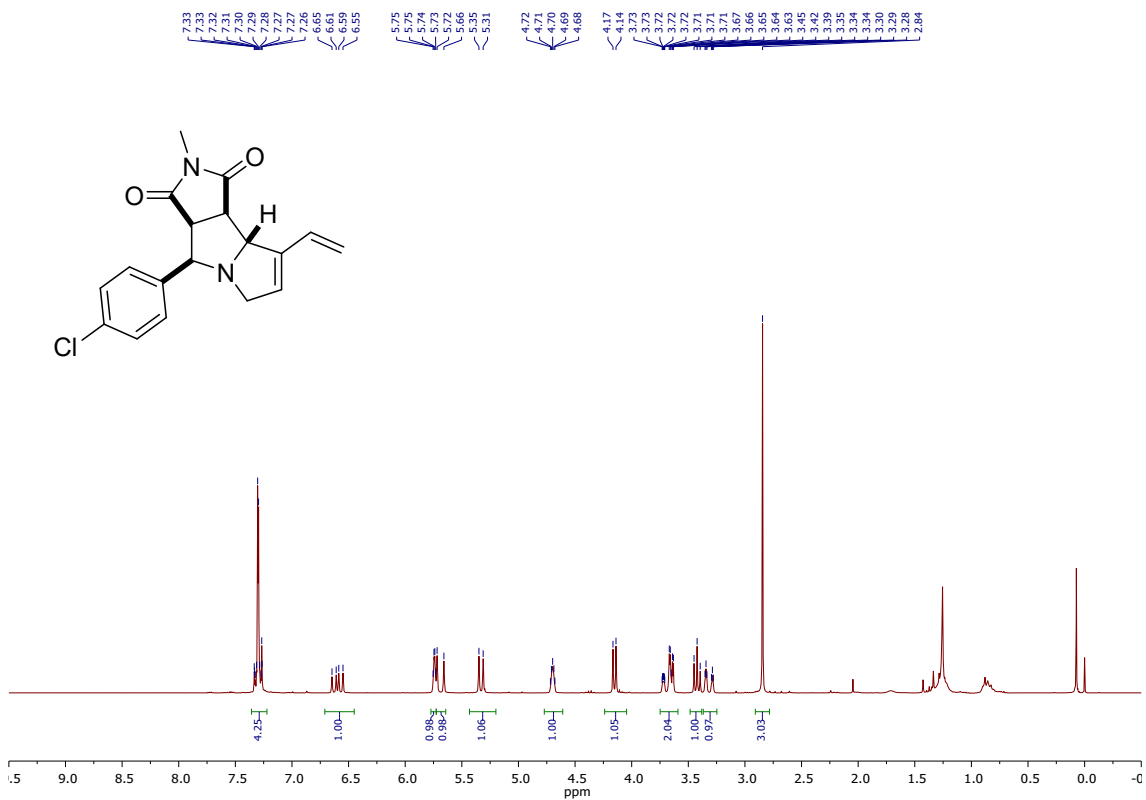

### $^{13}\text{C}\{^1\text{H}\}$ NMR of **6db**

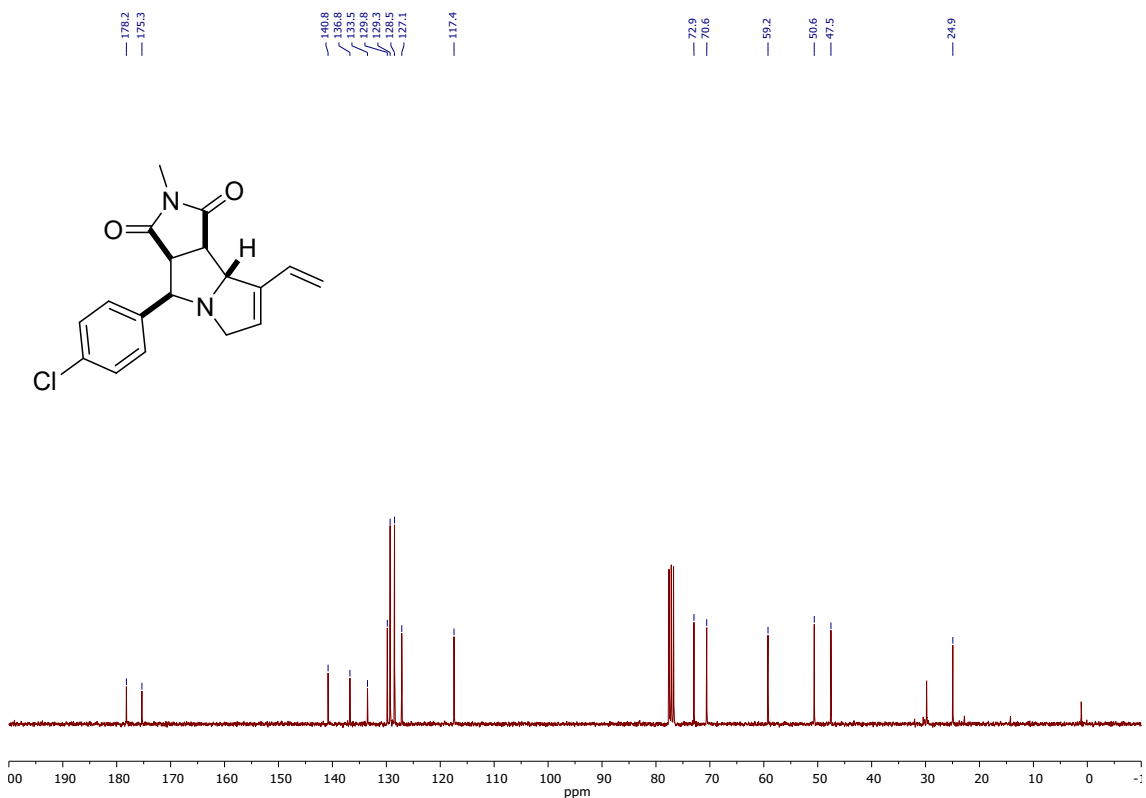

### $^1\text{H}$ NMR of **7ba**

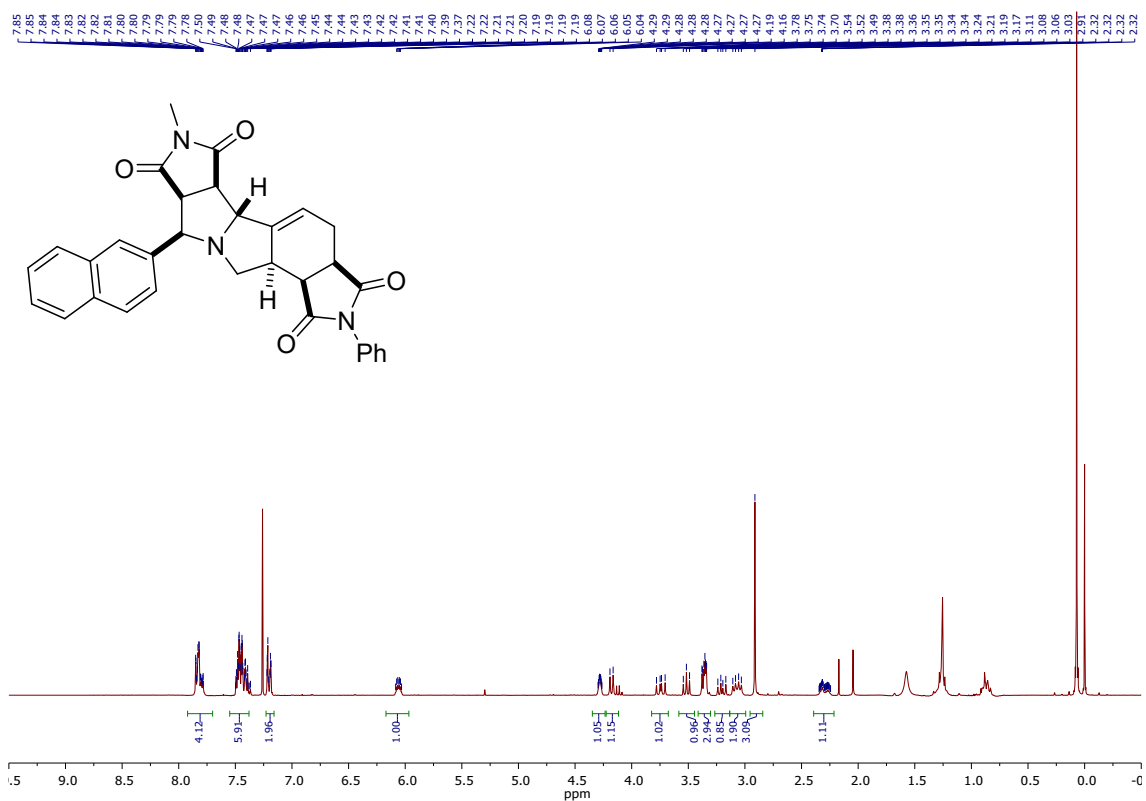



### $^{13}\text{C}\{\text{H}\}$ NMR of **7ba**

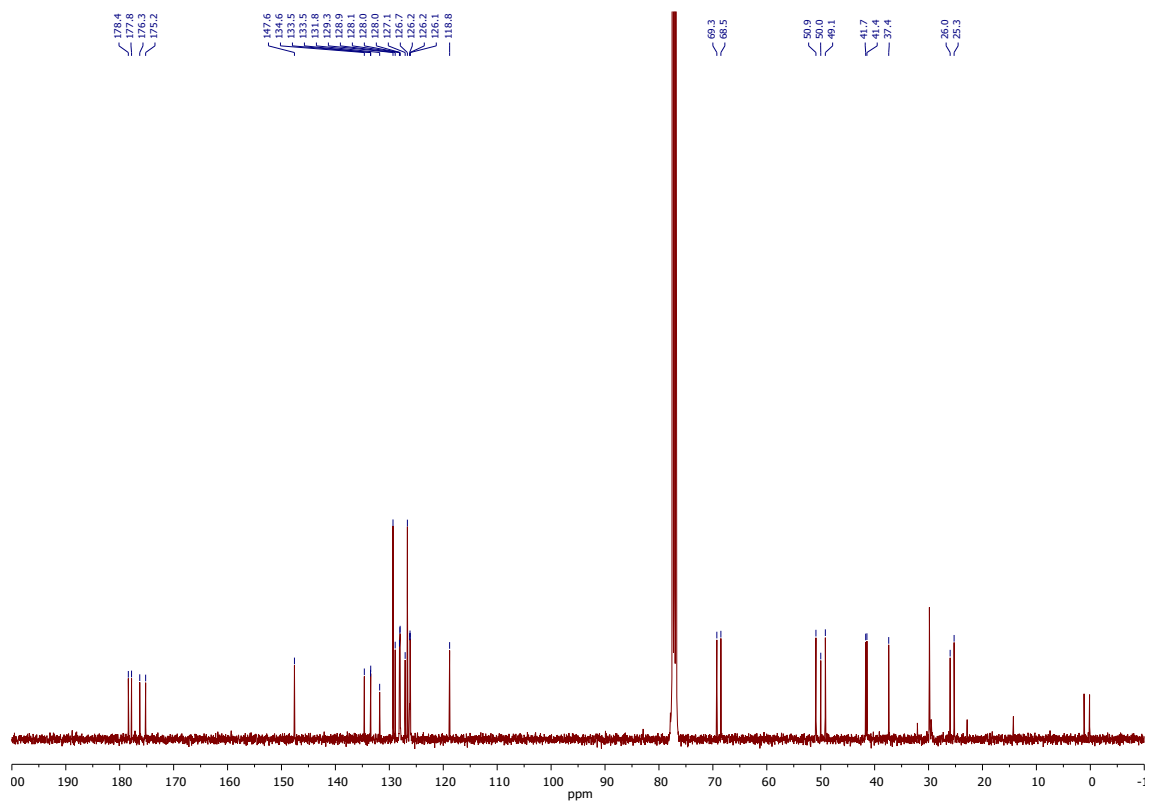

### $^1\text{H}$ NMR of **7da**

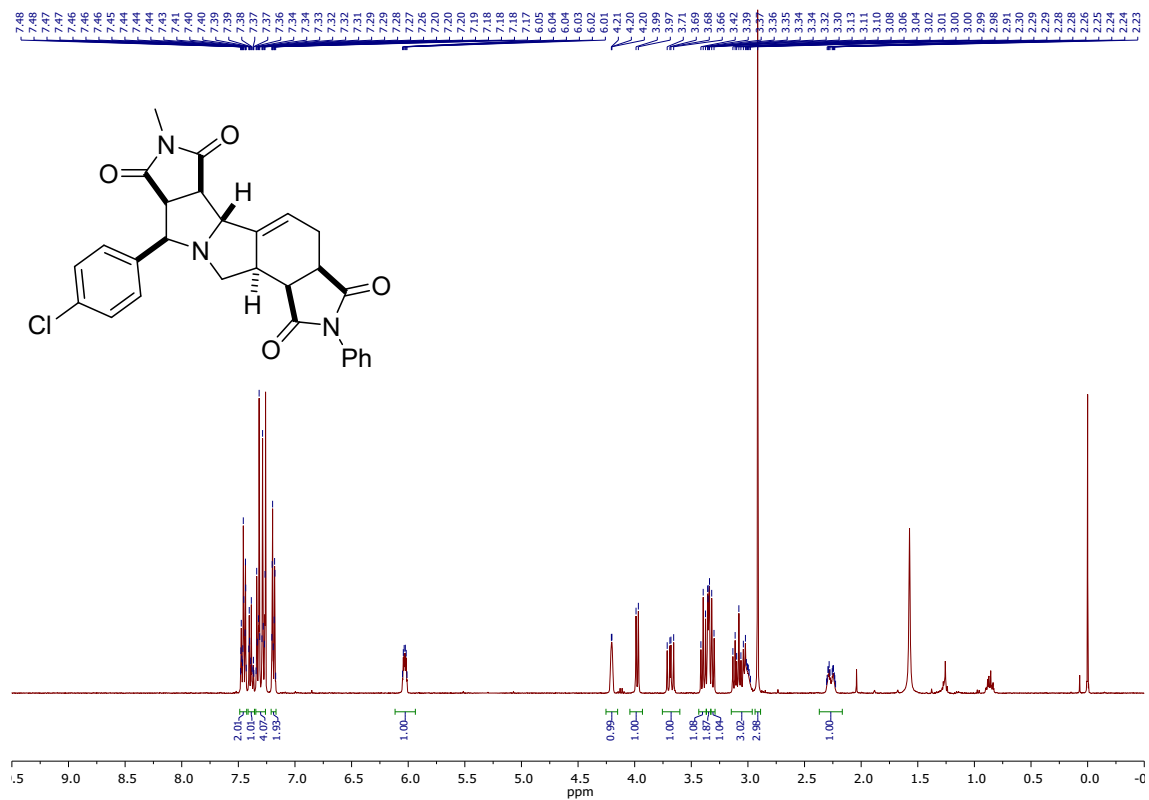

### $^{13}\text{C}\{^1\text{H}\}$ NMR of 7da

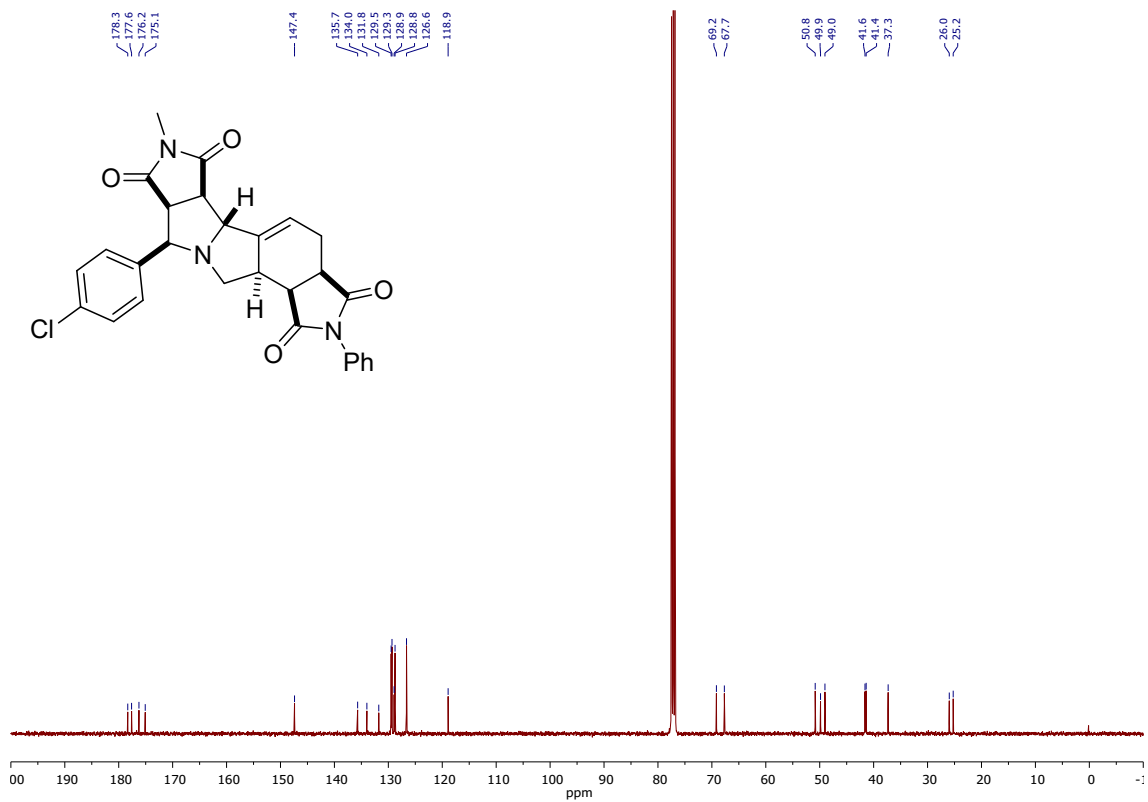

### NOESY of 7da

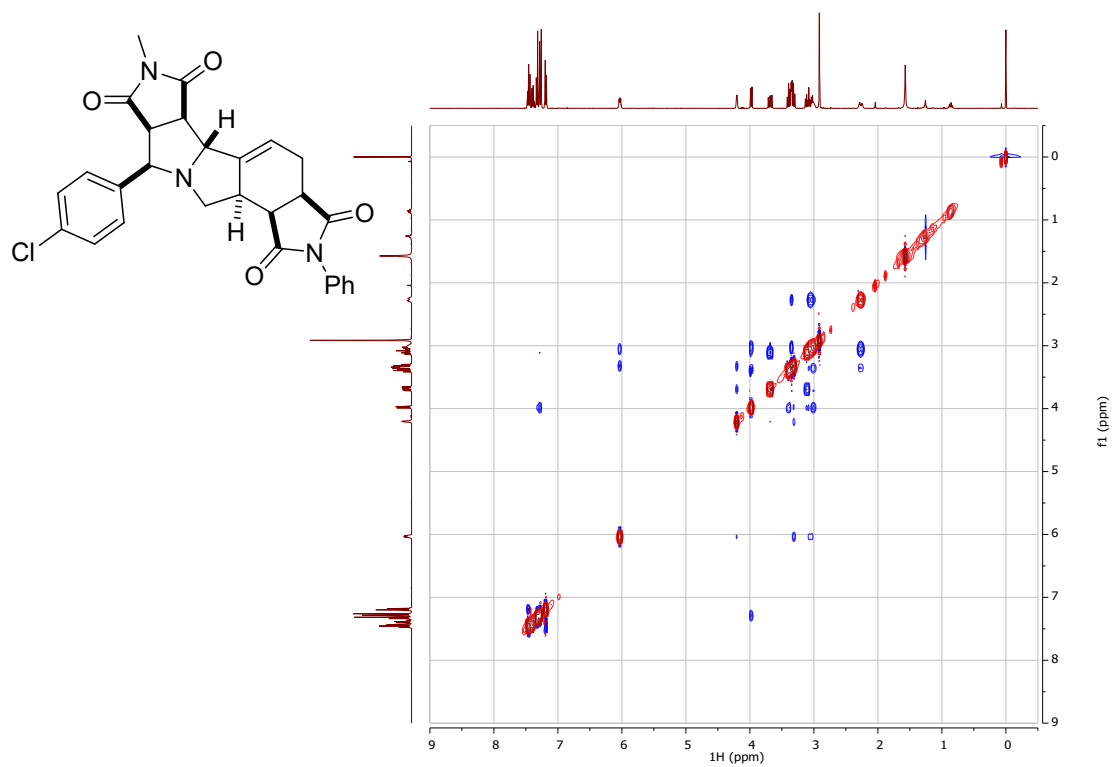

## 2. DFT CALCULATIONS

DFT calculations for optimization of saddle points were performed in terms of ONIOM method implemented in Gaussian16 suite of programs. Atoms in high layer were represented in ball&stick. Transparent ball&stick atoms represent the ones included in the low layer. In the high-level layer, the electron correlation was taken into account by using the hybrid functional B3LYP3. In order to consider nonbonding interactions and dispersion forces, single-point calculations of the optimized ONIOM structures were carried out employing the Truhlar functional M06. All stationary points were characterized by harmonic analysis. Reactants, intermediates and cycloadducts have positive definite Hessian matrices.

Favoured TS (347.14 kcal·mol<sup>-1</sup>) for **7ba**

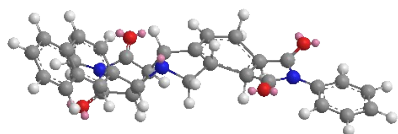

Cartesian coordinates (Å)

|       | X      | Y      | Z      |
|-------|--------|--------|--------|
| C(1)  | -2.287 | 0.133  | -0.695 |
| C(2)  | -2.712 | 0.814  | 0.611  |
| C(3)  | -1.399 | 1.131  | 1.371  |
| C(4)  | -0.269 | 0.665  | 0.442  |
| N(5)  | -0.879 | -0.225 | -0.537 |
| C(6)  | -3.375 | 2.172  | 0.448  |
| N(7)  | -2.608 | 3.137  | 1.053  |
| C(8)  | -1.478 | 2.623  | 1.640  |
| C(9)  | -0.889 | -1.636 | -0.152 |
| C(10) | -2.158 | -2.205 | -0.779 |
| C(11) | -3.010 | -1.170 | -0.908 |
| C(12) | -2.523 | -3.943 | -0.460 |
| C(13) | -3.828 | -4.129 | -0.734 |
| C(14) | -4.834 | -2.579 | -1.252 |
| C(15) | -4.314 | -1.333 | -1.183 |
| C(16) | -1.950 | -5.174 | -0.639 |
| N(17) | -2.842 | -6.093 | -0.774 |
| C(18) | -3.910 | -5.447 | -1.096 |
| C(19) | -2.970 | 4.544  | 1.102  |
| O(20) | -0.672 | 3.269  | 2.266  |
| O(21) | -4.416 | 2.375  | -0.127 |
| C(22) | 0.502  | 1.788  | -0.244 |
| C(23) | -0.086 | 2.650  | -1.091 |
| C(24) | 0.605  | 3.640  | -1.674 |
| C(25) | 1.916  | 3.799  | -1.426 |
| C(26) | 2.527  | 2.947  | -0.580 |

|        |        |         |        |
|--------|--------|---------|--------|
| C(27)  | 1.815  | 1.960   | -0.004 |
| C(28)  | -2.702 | -7.369  | -0.635 |
| C(29)  | -3.719 | -8.256  | -0.762 |
| C(30)  | -3.594 | -9.586  | -0.619 |
| C(31)  | -2.411 | -10.125 | -0.306 |
| C(32)  | -1.382 | -9.292  | -0.120 |
| C(33)  | -1.542 | -7.967  | -0.271 |
| O(34)  | -4.880 | -5.866  | -1.698 |
| O(35)  | -0.740 | -5.293  | -0.702 |
| C(36)  | 3.839  | 3.101   | -0.323 |
| C(37)  | 4.539  | 4.090   | -0.900 |
| C(38)  | 3.929  | 4.936   | -1.742 |
| C(39)  | 2.621  | 4.790   | -2.002 |
| H(40)  | -2.423 | 0.791   | -1.583 |
| H(41)  | -3.379 | 0.172   | 1.232  |
| H(42)  | -1.376 | 0.595   | 2.349  |
| H(43)  | 0.470  | 0.085   | 1.046  |
| H(44)  | 0.052  | -2.138  | -0.477 |
| H(45)  | -0.977 | -1.748  | 0.955  |
| H(46)  | -1.806 | -2.351  | -1.843 |
| H(47)  | -2.285 | -3.993  | 0.648  |
| H(48)  | -4.361 | -4.376  | 0.242  |
| H(49)  | -5.197 | -2.723  | -2.292 |
| H(50)  | -5.898 | -2.565  | -0.930 |
| H(51)  | -4.945 | -0.438  | -1.319 |
| H(52)  | -2.065 | 5.192   | 1.085  |
| H(53)  | -3.587 | 4.838   | 0.224  |
| H(54)  | -3.546 | 4.753   | 2.032  |
| H(55)  | -1.158 | 2.567   | -1.320 |
| H(56)  | 0.073  | 4.324   | -2.359 |
| H(57)  | 2.323  | 1.271   | 0.692  |
| H(58)  | -4.756 | -7.966  | -0.972 |
| H(59)  | -4.470 | -10.247 | -0.740 |
| H(60)  | -2.297 | -11.213 | -0.174 |
| H(61)  | -0.403 | -9.708  | 0.177  |
| H(62)  | -0.619 | -7.419  | -0.041 |
| H(63)  | 4.365  | 2.419   | 0.367  |
| H(64)  | 5.614  | 4.208   | -0.683 |
| H(65)  | 4.501  | 5.750   | -2.217 |
| H(66)  | 2.138  | 5.498   | -2.698 |
| Lp(67) | -0.597 | -0.162  | -1.064 |
| Lp(68) | -0.772 | 3.857   | 2.330  |
| Lp(69) | -0.199 | 2.978   | 2.495  |

|        |        |        |        |
|--------|--------|--------|--------|
| Lp(70) | -4.618 | 2.938  | -0.152 |
| Lp(71) | -4.697 | 1.903  | -0.369 |
| Lp(72) | -4.878 | -6.431 | -1.882 |
| Lp(73) | -5.325 | -5.480 | -1.811 |
| Lp(74) | -0.512 | -5.829 | -0.817 |
| Lp(75) | -0.409 | -4.798 | -0.633 |

Unfavoured TS (356.56 kcal·mol<sup>-1</sup>) for **7ba**

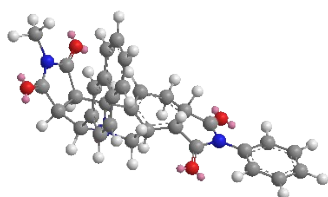

Cartesian coordinates (Å)

|       | X      | Y      | Z      |
|-------|--------|--------|--------|
| C(1)  | -1.761 | -0.234 | 0.066  |
| C(2)  | -3.260 | -0.409 | -0.138 |
| C(3)  | -3.654 | 0.998  | -0.711 |
| C(4)  | -2.398 | 1.903  | -0.600 |
| N(5)  | -1.690 | 1.165  | 0.422  |
| C(6)  | -3.672 | -1.367 | -1.240 |
| N(7)  | -4.243 | -0.667 | -2.277 |
| C(8)  | -4.239 | 0.693  | -2.075 |
| C(9)  | -0.309 | 1.365  | 0.806  |
| C(10) | -0.024 | 0.056  | 1.559  |
| C(11) | -0.900 | -0.875 | 1.108  |
| C(12) | 1.185  | -0.482 | 1.855  |
| C(13) | 1.280  | -1.780 | 2.205  |
| C(14) | 0.192  | -2.602 | 2.226  |
| C(15) | -0.815 | -2.177 | 1.427  |
| C(16) | 2.200  | 0.140  | 2.533  |
| N(17) | 3.009  | -0.716 | 3.054  |
| C(18) | 2.328  | -1.808 | 3.088  |
| C(19) | -4.715 | -1.291 | -3.502 |
| O(20) | -4.623 | 1.511  | -2.875 |
| O(21) | -3.501 | -2.562 | -1.227 |
| C(22) | -1.531 | 2.190  | -1.818 |
| C(23) | -0.862 | 3.356  | -1.880 |
| C(24) | -0.080 | 3.666  | -2.925 |
| C(25) | 0.059  | 2.810  | -3.951 |
| C(26) | -0.598 | 1.635  | -3.912 |

|        |        |        |        |
|--------|--------|--------|--------|
| C(27)  | -1.376 | 1.344  | -2.853 |
| C(28)  | 4.218  | -0.523 | 3.461  |
| C(29)  | 5.008  | -1.502 | 3.966  |
| C(30)  | 6.269  | -1.320 | 4.393  |
| C(31)  | 6.844  | -0.116 | 4.314  |
| C(32)  | 6.128  | 0.878  | 3.779  |
| C(33)  | 4.869  | 0.662  | 3.362  |
| O(34)  | 2.492  | -2.764 | 3.823  |
| O(35)  | 2.230  | 1.352  | 2.630  |
| C(36)  | -0.463 | 0.769  | -4.933 |
| C(37)  | 0.316  | 1.067  | -5.985 |
| C(38)  | 0.969  | 2.237  | -6.022 |
| C(39)  | 0.840  | 3.105  | -5.007 |
| H(40)  | -1.231 | -0.431 | -0.897 |
| H(41)  | -3.791 | -0.641 | 0.813  |
| H(42)  | -4.489 | 1.411  | -0.092 |
| H(43)  | -2.718 | 2.885  | -0.170 |
| H(44)  | -0.199 | 2.280  | 1.432  |
| H(45)  | 0.358  | 1.449  | -0.083 |
| H(46)  | -0.381 | 0.220  | 2.617  |
| H(47)  | 1.923  | -2.355 | 1.463  |
| H(49)  | -0.186 | -2.385 | 3.257  |
| H(52)  | -5.091 | -2.322 | -3.315 |
| H(53)  | -5.559 | -0.719 | -3.948 |
| H(54)  | -3.885 | -1.340 | -4.242 |
| H(55)  | -0.946 | 4.083  | -1.055 |
| H(56)  | 0.446  | 4.636  | -2.923 |
| H(57)  | -1.891 | 0.374  | -2.843 |
| H(58)  | 4.696  | -2.550 | 4.053  |
| H(59)  | 6.851  | -2.168 | 4.795  |
| H(60)  | 7.881  | 0.044  | 4.650  |
| H(61)  | 6.592  | 1.874  | 3.667  |
| H(62)  | 4.433  | 1.561  | 2.908  |
| H(63)  | -0.989 | -0.201 | -4.928 |
| H(64)  | 0.420  | 0.351  | -6.817 |
| H(65)  | 1.611  | 2.484  | -6.884 |
| H(66)  | 1.387  | 4.062  | -5.057 |
| Lp(67) | -2.013 | 1.233  | 0.926  |
| Lp(68) | -4.836 | 1.312  | -3.399 |
| Lp(69) | -4.586 | 2.090  | -2.722 |
| Lp(70) | -3.681 | -2.877 | -1.704 |
| Lp(71) | -3.236 | -2.800 | -0.744 |
| Lp(72) | 2.928  | -2.740 | 4.227  |

|        |        |        |       |
|--------|--------|--------|-------|
| Lp(73) | 2.111  | -3.225 | 3.770 |
| Lp(74) | 2.657  | 1.601  | 2.961 |
| Lp(75) | 1.798  | 1.664  | 2.356 |
| H(77)  | 0.348  | -3.699 | 2.234 |
| H(78)  | 1.707  | -0.241 | 0.876 |
| H(79)  | -1.435 | -2.896 | 0.866 |

**7ba** (59.80 kcal·mol<sup>-1</sup>)

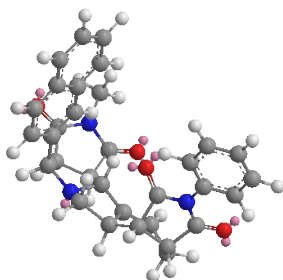

Cartesian coordinates (Å)

|       | X      | Y      | Z      |
|-------|--------|--------|--------|
| C(1)  | -0.292 | -1.387 | 1.493  |
| C(2)  | -1.489 | -2.035 | 2.176  |
| C(3)  | -1.909 | -0.913 | 3.187  |
| C(4)  | -0.810 | 0.179  | 3.130  |
| N(5)  | 0.271  | -0.599 | 2.562  |
| C(6)  | -2.723 | -2.218 | 1.313  |
| N(7)  | -3.716 | -1.366 | 1.737  |
| C(8)  | -3.327 | -0.563 | 2.782  |
| C(9)  | 1.486  | -0.019 | 2.026  |
| C(10) | 2.095  | -1.248 | 1.301  |
| C(11) | 0.898  | -2.096 | 0.953  |
| C(12) | 2.908  | -1.068 | 0.019  |
| C(13) | 3.240  | -2.416 | -0.663 |
| C(14) | 2.400  | -3.626 | -0.192 |
| C(15) | 1.014  | -3.217 | 0.238  |
| C(16) | 2.226  | -0.417 | -1.184 |
| N(17) | 2.771  | -0.791 | -2.276 |
| C(18) | 2.986  | -2.041 | -2.126 |
| C(19) | -5.016 | -1.265 | 1.092  |
| O(20) | -4.009 | 0.298  | 3.284  |
| O(21) | -2.817 | -2.978 | 0.380  |
| C(22) | -1.055 | 1.476  | 2.369  |
| C(23) | -0.478 | 2.610  | 2.808  |
| C(24) | -0.647 | 3.779  | 2.172  |

|        |        |        |        |
|--------|--------|--------|--------|
| C(25)  | -1.405 | 3.851  | 1.065  |
| C(26)  | -1.992 | 2.730  | 0.604  |
| C(27)  | -1.809 | 1.568  | 1.258  |
| C(28)  | 2.963  | -0.063 | -3.319 |
| C(29)  | 3.532  | -0.523 | -4.457 |
| C(30)  | 3.738  | 0.239  | -5.543 |
| C(31)  | 3.397  | 1.534  | -5.535 |
| C(32)  | 2.870  | 2.043  | -4.415 |
| C(33)  | 2.674  | 1.260  | -3.342 |
| O(34)  | 2.955  | -2.900 | -2.982 |
| O(35)  | 1.248  | 0.293  | -1.091 |
| C(36)  | -2.750 | 2.790  | -0.506 |
| C(37)  | -2.925 | 3.952  | -1.154 |
| C(38)  | -2.339 | 5.067  | -0.694 |
| C(39)  | -1.582 | 5.014  | 0.412  |
| H(40)  | -0.639 | -0.732 | 0.661  |
| H(41)  | -1.218 | -2.984 | 2.691  |
| H(42)  | -1.969 | -1.359 | 4.211  |
| H(43)  | -0.536 | 0.445  | 4.181  |
| H(44)  | 2.147  | 0.373  | 2.832  |
| H(45)  | 1.268  | 0.817  | 1.330  |
| H(46)  | 2.705  | -1.820 | 2.044  |
| H(47)  | 3.829  | -0.474 | 0.231  |
| H(48)  | 4.328  | -2.654 | -0.576 |
| H(49)  | 2.888  | -4.108 | 0.688  |
| H(50)  | 2.340  | -4.407 | -0.984 |
| H(51)  | 0.138  | -3.830 | -0.019 |
| H(52)  | -5.329 | -2.238 | 0.651  |
| H(53)  | -5.807 | -0.976 | 1.820  |
| H(54)  | -4.975 | -0.501 | 0.284  |
| H(55)  | 0.159  | 2.591  | 3.708  |
| H(56)  | -0.148 | 4.677  | 2.574  |
| H(57)  | -2.292 | 0.668  | 0.854  |
| H(58)  | 3.889  | -1.557 | -4.570 |
| H(59)  | 4.205  | -0.191 | -6.445 |
| H(60)  | 3.572  | 2.170  | -6.418 |
| H(61)  | 2.614  | 3.115  | -4.376 |
| H(62)  | 2.273  | 1.796  | -2.468 |
| H(63)  | -3.243 | 1.887  | -0.906 |
| H(64)  | -3.547 | 3.991  | -2.063 |
| H(65)  | -2.480 | 6.023  | -1.224 |
| H(66)  | -1.108 | 5.944  | 0.773  |
| Lp(67) | 0.444  | -0.982 | 2.993  |



|        |        |        |        |
|--------|--------|--------|--------|
| Lp(68) | -4.561 | 0.382  | 3.065  |
| Lp(69) | -3.772 | 0.614  | 3.735  |
| Lp(70) | -3.336 | -2.992 | 0.080  |
| Lp(71) | -2.340 | -3.317 | 0.247  |
| Lp(72) | 2.825  | -2.740 | -3.542 |
| Lp(73) | 3.063  | -3.464 | -2.808 |
| Lp(74) | 0.995  | 0.499  | -1.594 |
| Lp(75) | 1.039  | 0.403  | -0.543 |

*Diast-7ba* (60.13 kcal·mol<sup>-1</sup>)

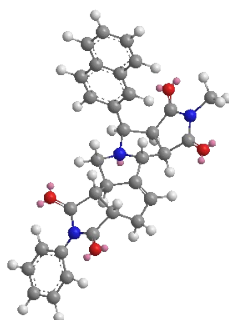

Cartesian coordinates (Å)

|       | X      | Y      | Z      |
|-------|--------|--------|--------|
| C(1)  | -1.437 | -0.337 | 0.065  |
| C(2)  | -2.953 | -0.284 | 0.207  |
| C(3)  | -3.264 | 1.148  | -0.352 |
| C(4)  | -1.899 | 1.849  | -0.578 |
| N(5)  | -1.073 | 1.041  | 0.293  |
| C(6)  | -3.738 | -1.203 | -0.709 |
| N(7)  | -4.387 | -0.460 | -1.667 |
| C(8)  | -4.176 | 0.892  | -1.534 |
| C(9)  | 0.375  | 1.055  | 0.290  |
| C(10) | 0.657  | -0.139 | 1.240  |
| C(11) | -0.497 | -1.072 | 0.956  |
| C(12) | 1.973  | -0.894 | 1.055  |
| C(13) | 1.948  | -2.331 | 1.608  |
| C(14) | 0.628  | -2.792 | 2.253  |
| C(15) | -0.539 | -2.321 | 1.426  |
| C(16) | 3.108  | -0.319 | 1.891  |
| N(17) | 3.333  | -1.012 | 2.942  |
| C(18) | 3.092  | -2.223 | 2.609  |
| C(19) | -5.228 | -1.035 | -2.705 |
| O(20) | -4.646 | 1.737  | -2.257 |
| O(21) | -3.778 | -2.406 | -0.621 |
| C(22) | -1.317 | 1.976  | -1.980 |
| C(23) | -0.549 | 3.042  | -2.273 |

|       |        |        |        |
|-------|--------|--------|--------|
| C(24) | -0.008 | 3.209  | -3.489 |
| C(25) | -0.219 | 2.305  | -4.460 |
| C(26) | -0.981 | 1.227  | -4.191 |
| C(27) | -1.513 | 1.079  | -2.964 |
| C(28) | 3.784  | -0.592 | 4.071  |
| C(29) | 3.997  | -1.409 | 5.129  |
| C(30) | 4.461  | -0.983 | 6.315  |
| C(31) | 4.719  | 0.315  | 6.513  |
| C(32) | 4.481  | 1.166  | 5.509  |
| C(33) | 4.016  | 0.715  | 4.332  |
| O(34) | 3.690  | -3.220 | 2.957  |
| O(35) | 3.705  | 0.662  | 1.501  |
| C(36) | -1.197 | 0.314  | -5.156 |
| C(37) | -0.663 | 0.468  | -6.377 |
| C(38) | 0.095  | 1.542  | -6.642 |
| C(39) | 0.316  | 2.456  | -5.685 |
| H(40) | -1.160 | -0.652 | -0.968 |
| H(41) | -3.280 | -0.400 | 1.265  |
| H(42) | -3.869 | 1.703  | 0.407  |
| H(43) | -1.967 | 2.877  | -0.143 |
| H(44) | 0.790  | 2.016  | 0.672  |
| H(45) | 0.782  | 0.858  | -0.728 |
| H(46) | 0.546  | 0.197  | 2.300  |
| H(47) | 2.270  | -0.904 | -0.020 |
| H(48) | 2.239  | -3.045 | 0.800  |
| H(49) | 0.516  | -2.374 | 3.280  |
| H(50) | 0.620  | -3.904 | 2.339  |
| H(51) | -1.386 | -2.989 | 1.212  |
| H(52) | -4.972 | -2.100 | -2.903 |
| H(53) | -6.297 | -0.976 | -2.400 |
| H(54) | -5.096 | -0.492 | -3.668 |
| H(55) | -0.348 | 3.805  | -1.501 |
| H(56) | 0.614  | 4.101  | -3.674 |
| H(57) | -2.121 | 0.186  | -2.769 |
| H(58) | 3.784  | -2.488 | 5.103  |
| H(59) | 4.618  | -1.698 | 7.141  |
| H(60) | 5.090  | 0.676  | 7.486  |
| H(61) | 4.654  | 2.246  | 5.663  |
| H(62) | 3.820  | 1.514  | 3.602  |
| H(63) | -1.818 | -0.579 | -4.964 |
| H(64) | -0.846 | -0.285 | -7.161 |
| H(65) | 0.536  | 1.671  | -7.645 |
| H(66) | 0.943  | 3.331  | -5.925 |

|        |        |        |        |
|--------|--------|--------|--------|
| Lp(67) | -1.241 | 1.179  | 0.855  |
| Lp(68) | -4.999 | 1.557  | -2.707 |
| Lp(69) | -4.509 | 2.310  | -2.141 |
| Lp(70) | -4.108 | -2.707 | -1.021 |
| Lp(71) | -3.464 | -2.664 | -0.179 |
| Lp(72) | 4.156  | -3.158 | 3.327  |
| Lp(73) | 3.502  | -3.744 | 2.732  |
| Lp(74) | 4.168  | 0.861  | 1.824  |
| Lp(75) | 3.520  | 0.906  | 0.985  |
